# Annual phytoplankton dynamics in coastal waters from Fildes Bay, Western Antarctic Peninsula.

**Nicole Trefault<sup>1+\*</sup>, Rodrigo De la Iglesia<sup>2+</sup>, Mario Moreno-Pino<sup>1</sup>, Adriana Lopes dos Santos<sup>3</sup>, Catherine Gérikas Ribeiro<sup>1</sup>, Antonia Cristi<sup>1</sup>, Dominique Marie<sup>4</sup>, and Daniel Vaultot<sup>4, 3\*</sup>**

<sup>1</sup>GEMA Center for Genomics, Ecology & Environment, Faculty of Sciences, Universidad Mayor, Santiago, 8580745, Chile

<sup>2</sup>Department of Molecular Genetics and Microbiology, Pontificia Universidad Católica de Chile, Alameda 340, Santiago, 8331150, Chile

<sup>3</sup>Asian School of the Environment, Nanyang Technological University, 50 Nanyang Avenue, Singapore 639798

<sup>4</sup>Sorbonne Université, CNRS, UMR7144, Ecology of Marine Plankton team, Station Biologique de Roscoff, 29680 Roscoff, France

\*Corresponding authors: [nicole.trefault@umayor.cl](mailto:nicole.trefault@umayor.cl), [vaulot@gmail.com](mailto:vaulot@gmail.com)

+These authors contributed equally to this work

## ORCID Numbers

- Adriana Lopes dos Santos: 0000-0002-0736-4937
- Daniel Vaultot: 0000-0002-0717-5685
- Catherine Gérikas Ribeiro: 0000-0003-0531-2313
- Antonia Cristi: 0000-0003-1381-8170
- Rodrigo De la Iglesia: 0000-0002-2000-8697

## 1 **Abstract**

2 Year-round reports of phytoplankton dynamics in the West Antarctic Peninsula are rare and mainly limited  
3 to microscopy and/or pigment-based studies. We analyzed the phytoplankton community from coastal  
4 waters of Fildes Bay in the West Antarctic Peninsula between January 2014 and 2015 using metabarcoding  
5 of the nuclear and plastidial 18/16S rRNA gene from both size-fractionated and flow cytometry sorted  
6 samples. Each metabarcoding approach yielded a different image of the phytoplankton community  
7 with for example Prymnesiophyceae more prevalent in plastidial metabarcodes and Mamiellophyceae  
8 in nuclear ones. Overall 14 classes of photosynthetic eukaryotes were present in our samples with the  
9 following dominating: Bacillariophyta (diatoms), Pelagophyceae and Dictyochophyceae for division  
10 Ochrophyta, Mamiellophyceae and Pyramimonadophyceae for division Chlorophyta, Prymnesiophyceae  
11 and Cryptophyceae. Diatoms were dominant in the larger size fractions and during summer, while  
12 Prymnesiophyceae and Cryptophyceae were dominant in colder seasons. Pelagophyceae were particularly  
13 abundant towards the end of autumn (May). In addition of *Micromonas polaris* and *Micromonas* sp.  
14 clade B3, both previously reported in Arctic waters, we detected a new *Micromonas* 18S rRNA sequence  
15 signature, close to but clearly distinct from *M. polaris*, which potentially represent a new clade specific of  
16 the Antarctic. These results highlight the need for complementary strategies as well as the importance  
17 of year-round monitoring for a comprehensive description of phytoplankton communities in Antarctic  
18 coastal waters.

## 19 Introduction

20 Phytoplankton represents the main energy input to the marine ecosystem in Antarctica, providing fixed  
21 carbon to marine and terrestrial systems, being the primary food source, and therefore the base of the  
22 entire Antarctic food web (Browning et al. 2014; Smetacek and Nicol 2005). Summer phytoplankton  
23 blooms in nutrient rich coastal waters are critical to fuel the Antarctic marine ecosystem and to maintain  
24 energy fluxes during the long winter. Each year, the temperature increase and the melting of ice during the  
25 Austral spring induces a succession of phytoplankton communities which understanding is crucial, since it  
26 has profound implications at planetary scales, from the architecture and efficiency of the trophic webs,  
27 to the carbon sedimentation to deep waters and the global biogeochemical cycles (Garibotti et al. 2005).  
28 Monitoring natural phytoplankton populations is challenging, especially in high latitude environments such  
29 Antarctica given logistical field difficulties. Long time series such as the Rothera Time Series (RaTS) and  
30 the Palmer Long-Term Ecological Research (PAL-LTER) program help understanding of the year-round  
31 Antarctic phytoplankton dynamics.

32 The Western Antarctic Peninsula (WAP) is one of the fastest warming areas on Earth (Clem et al.  
33 2020) and is characterized by strong spatial and temporal variability (Martinson et al. 2008). Previous  
34 studies have shown regional differences between the northern and southern areas of the WAP, mainly  
35 related to mixed layer depth and phytoplankton productivity (Schofield et al. 2018), as well as inter-  
36 decadal variability of phytoplankton biomass along the coast of the WAP, with essential role of local-scale  
37 forcing on phytoplankton dynamics (Kim et al. 2018). Differences between WAP eastern and western  
38 coastal areas have also been described, the former mostly dominated by benthic diatoms and the latter  
39 by pelagic ones (Lange et al. 2018). A two year sampling study in Admiralty Bay (King George Island,  
40 WAP) reported that spring-summer biomass maxima were dominated by pico-phytoplankton and nano-  
41 sized flagellates, followed in abundance by diatoms and dinoflagellates (Kopczynska 2008). In Ryder  
42 Bay (Adelaide Island), high temperatures were reported to be correlated with increased nano-sized  
43 cryptophytes abundance, whereas the haptophyte *Phaeocystis antarctica* increased in relation to high  
44 irradiance and low salinity (Biggs et al. 2019). *P. antarctica*, which is replaced by *Phaeocystis pouchetii*  
45 in the Arctic ocean (Assmy et al. 2017), is widely present in the WAP (Biggs et al. 2019; Egas et al.

46 2017) as well as in other Antarctic regions (Arrigo et al. 1999; Delmont et al. 2014). In Fildes Bay (King  
47 George Island), phytoplankton showed a rapid increase in biomass and cell abundance as a consequence  
48 of short vertical mixing events in the water column, with a strong dominance of nano-phytoplankton,  
49 represented by *Thalassiosira* and *Phaeocystis* (Egas et al. 2017). Large diatoms, *Phaeocystis*, and  
50 mixotrophic/phagotrophic dinoflagellates, explain most spatial variability in the carbon export potential of  
51 the WAP (Lin et al. 2017). More recently, metagenomic and metatranscriptomic analyses of pico- and  
52 nano- size fractions of the plankton community from Chile Bay (Greenwich Island, WAP) indicated that  
53 while diatoms completely dominated the RNA and DNA-based analyses, alveolates, cryptophytes and  
54 haptophytes appear in the RNA-based analyses (possibly corresponding to the active fraction), suggesting  
55 that other phytoplankton groups besides diatoms are also actively growing (Alcamán-Arias et al. 2018).  
56 From the spatial point of view, variation of phytoplankton across environmental gradients in Fildes Bay,  
57 studied using flow cytometry and metabarcoding of the plastidial 16S rRNA gene, indicated, that although  
58 the community composition was mostly similar at sub-mesoscale, the abundance of specific phytoplankton  
59 groups was responsive to salinity and nutrient inputs (Moreno-Pino et al. 2016).

60 Environmental sequencing of taxonomic marker genes first by the Sanger technique and then high  
61 throughput techniques (metabarcoding) has improved our ability to detect and identify groups that are  
62 difficult to cultivate or identify by other methodologies (e.g. microscopy). Two marker genes have  
63 been used for phytoplankton diversity studies: nuclear 18S rRNA and plastidial 16S rRNA (Fuller et al.  
64 2006; Moon-van der Staay et al. 2001) yielding quite different images of the community structure (Shi  
65 et al. 2011). The use of different cell collection and filtering approaches have also shown differences in  
66 the resulting phytoplankton community composition: besides size-fractionation by filtration, a classical  
67 approach based on cell size proposed by Sieburth *et al.* (1978), flow cytometry sorting enables to better  
68 assess the diversity of small photosynthetic eukaryotes for the pico- and nano-sized fractions (Balzano  
69 et al. 2012b; Marie et al. 2010).

70 In the present study, we sampled the phytoplankton community in coastal waters from Fildes Bay  
71 (also called Maxwell Bay, South Shetland Islands, WAP) between January 2014 and 2015, with the aim  
72 to assess changes in phytoplankton abundance, diversity and community composition occurring along  
73 the Austral year. We used three complementary approaches: size-fractionated samples with nuclear 18S

74 rRNA and plastidial 16S rRNA metabarcoding, and flow cytometry sorted samples with 18S rRNA.

## 75 **Results**

### 76 **Annual phytoplankton variation**

77 We sampled phytoplankton in coastal waters of Fildes Bay, King George Island, at the eastern tip of the  
78 WAP (Figure 1A), between January 2014 and 2015 at all seasons except winter (Table 1). Phytoplankton  
79 abundance measured by flow cytometry was higher during the summer, compared to the rest of the year  
80 (Figure 1B). In autumn, we detected low and uniform levels of the three phytoplankton populations, pico-  
81 eukaryotes (PPE), photosynthetic nano-eukaryotes (PNE) and cryptophytes (CRY), with values between  
82 47 and 342 cells mL<sup>-1</sup> for CRY and PPE, respectively (Supplementary Data S1). CRY showed similar  
83 values between summer 2014 and 2015, while PPE and PNE showed an inverted pattern of abundance.  
84 PNE were, on average, three times higher than PPE in summer 2015, while it was the reverse in 2014.

85 Nutrients (NO<sub>3</sub><sup>-2</sup>, PO<sub>4</sub><sup>-3</sup>, SiO<sub>3</sub><sup>-4</sup>) showed maximum levels during autumn and spring, when lower  
86 phytoplankton abundance was recorded, and minimum levels during summer, when phytoplankton  
87 abundance was higher (Figure 1C). Silicate was the nutrient with the highest concentration, followed by  
88 nitrate and phosphate. Chlorophyll *a* (Chl *a*) concentration, a proxy of phytoplankton biomass, was below  
89 0.4 mg m<sup>-3</sup> in autumn and spring. Chl *a* was higher in summer 2014 compared to 2015 (Figure 1D).

### 90 **Overall composition of the phytoplankton community**

91 Phytoplankton composition was analyzed by three different metabarcoding approaches (Tables 1 and 2).  
92 Filtered samples (3 size fractions) were analyzed using both the nuclear 18S rRNA gene, hereafter 18S-  
93 filter, and the plastidial 16S rRNA gene, hereafter 16S-filter, while during summer 2015 we were also able  
94 to obtain 18S rRNA sequences from flow cytometry sorted populations (pico- and nano-phytoplankton),  
95 hereafter 18S-sort. The sequence data were processed with the dada2 pipeline (Callahan et al. 2016)  
96 that cluster reads into amplicon sequence variant (ASV). In this paper, we are focusing on the five major  
97 eukaryotic divisions that contain photosynthetic taxa: Ochrophyta (in particular diatoms), Chlorophyta  
98 (green algae), Haptophyta, Cryptophyta and Rhodophyta (mostly macroalgae). Because a large fraction of  
99 dinoflagellate species are heterotrophic, even within the same genus (Jeong et al. 2010), and Chrysophyceae

100 (Ochrophyta) ASVs were assigned to heterotrophic taxa such as *Paraphysomonas* or *Spumella* and to  
101 uncultured clades that are known or hypothesized to be heterotrophic, we have excluded these groups from  
102 our analysis. Classes for which all the taxa recovered corresponded to macro-algae were also excluded:  
103 Bangiophyceae and Florideophyceae (Rhodophyta), Xanthophyceae and Phaeophyceae (Ochrophyta).  
104 The total number of ASVs corresponding to photosynthetic taxa varied from 189 for the sorted samples  
105 to 564 for the filtered samples. The average number of reads corresponding to photosynthetic taxa was  
106 around 30,000 per sample (Table 2).

107 An analysis performed in January 2015 over a vertical profile revealed that the water column was not  
108 stratified (Table S1) and that the class composition of the phytoplankton community in each size fraction  
109 (Figure S1) was fairly uniform vertically. Therefore surface samples can be considered to be representative  
110 of the whole water column. It should be noted however that some species were only found at depth in the  
111 euphotic zone samples and not in surface (Table S2).

112 Phytoplankton communities in WAP coastal waters were highly diverse, with 14 classes and 156 species  
113 detected in surface samples (Table S3). The major classes were Bacillariophyta (diatoms), Pelagophyceae  
114 and Dictyochophyceae for division Ochrophyta, Mamiellophyceae and Pyramimonadophyceae for division  
115 Chlorophyta (green algae), Prymnesiophyceae and Cryptophyceae (Figures 2 and S2).

116 Among Ochrophyta, Bacillariophyta were dominating with the species *Porosira glacialis*, *Fragilar-*  
117 *iopsis cylindrus* and *Chaetoceros neogracilis*, and the genera *Minidiscus* and *Thalassiosira* as major  
118 taxa. The sequence of the main ASV assigned to *C. neogracilis* (found in both 18S-filter and 18S-sort  
119 datasets) is 100% similar to an Antarctic strain AnM0002 (Genbank EU090012) but differs by 7 positions  
120 within the V4 region of 18S rRNA (98.1 % similarity) from all Arctic strains, suggesting that it is a  
121 distinct, yet undescribed, species (Figure S3). For some genera such as *Thalassiosira* and *Minidiscus*, the  
122 identification down to the species level is difficult because reference sequences are lacking for Antarctic  
123 species. The sequence of the main *Minidiscus* ASV (asv\_016\_00002 from the 18S-filter dataset also  
124 found in the 18S-sort dataset) is 100% similar (Figure S4) to strain [RCC4582](#) (Genbank MH843669)  
125 which was isolated from Fildes Bay in January 2015. RCC4582 cells are about 5  $\mu\text{m}$  in size and were  
126 tentatively identified as *M. chilensis* (unpublished observations). This sequence (asv\_016\_00002) was also  
127 100% identical to *Shionodiscus oestrupii* var. *venrickiae* strain CC03-15 (Genbank DQ514870) which

128 has larger cells (Wilks and Armand 2017) and therefore is probably mis-identified. Within *Thalassiosira*,  
129 the major ASV (asv\_016\_00006 also present in 18S-sort) is 100% similar to *Thalassiosira antarctica*  
130 strain UNC1404 (KX253953) that was isolated off the WAP (Moreno et al. 2018). The second ASV  
131 (asv\_016\_00008 also present in 18S-sort) is 100 % identical to *Thalassiosira minima* strain RCC2265  
132 which was isolated from the Arctic (Balzano et al. 2017) but also to strain RCC4586 which was isolated  
133 from Fildes Bay. In contrast, the next *Thalassiosira* ASV (asv\_016\_00016 also found in 18S-sort) does  
134 not match any existing sequence from cultures.

135 Within Pelagophyceae, two of the major ASV (found in both 18S rRNA datasets) share 99.7 %  
136 similarity between them and do not match any described species or even cultured strain, suggesting that  
137 they corresponds to a new taxon. One less abundant ASV found in both 18S rRNA datasets matches  
138 at 100% *Pelagomonas calceolata*, the type species of this class which is widespread in open oceanic  
139 waters (Worden et al. 2012). Among Dictyochophyceae, the main ASV matches with 97.7% similarity  
140 *Helicopedinella tricostata* and with higher similarity (99.2%) an undescribed strain (RCC2289) isolated  
141 from the Arctic (Balzano et al. 2012a), suggesting that this ASV may correspond to a new species or  
142 even genus, while some of the other ASVs match the species *Florenciella parvula* and *Pseudochattonella*  
143 *farciemen*. Bolidophyceae were represented by *Triparma laevis* as well as environmental clades (Kuwata  
144 et al. 2018). One uncultivated group MOCH-2 (Marine OCHrophyta, Massana et al. 2014) was found in  
145 many filtered and sorted samples although at low abundance.

146 Among Chlorophyta, Mamiellophyceae dominated with three major taxa: *Micromonas polaris*, *Mi-*  
147 *cromonas* sp. clade B3 (uncultured) and *Bathycoccus prasinos*. While the main *M. polaris* ASVs (found  
148 in both 18S datasets) were 100% identical to Arctic strains, some minor *M. polaris* ASVs have a clearly  
149 different signature (Figure S5, arrows). On the other hand, the clade B3 ASVs matched the reference  
150 sequences from this clade (Tragin and Vaulot 2019). Among Pyramimonadophyceae, the major ASV  
151 (present in both 18S datasets) corresponds to the mixotrophic species *Pyramimonas gelidicola*. The  
152 other green classes (Trebouxiophyceae, Chlorophyceae, Ulvophyceae and Palmophyllophyceae) or orders  
153 (Pseudoscourfeldiales) were only minor contributors to the community.

154 *Phaeocystis antarctica* was the dominant Prymnesiophyceae (Haptophyta) species among 18S rRNA  
155 metabarcodes (Figure S6). However, in the sorted samples, we also found a minor ASV (asv\_018\_00239),



156 not present in surface but only at depth (Table S2), with a 100% match to a strain of the arctic species  
157 *Phaeocystis pouchetii*. Surprisingly, the sequence of the three dominant Prymnesiophyceae ASVs in the  
158 16S metabarcodes matched *Chrysochromulina thronsdonii* with about 98% similarity, while they were  
159 matching *P. antarctica* with only 93% similarity. The fourth Prymnesiophyceae ASV (asv\_017\_00037)  
160 matched a *P. antarctica* strain at 100%.

161 Among Cryptophyceae, the dominant species was *Geminigera cryophila* with small contributions  
162 of the genera *Hemiselmis* and *Plagioselmis*. The most abundant ASV (asv\_016\_00003) found in both  
163 18S-filter and 18S-sort is 99.7% similar to a sequence from a recently isolate of *G. cryophila* from  
164 Antarctica (HQ111513, Hoff et al. 2020). Another abundant Cryptophyceae ASV (asv\_016\_00113) is  
165 100% similar to several strains isolated from the Wedell and Ross Seas, some originating from the ice (e.g.  
166 RCC5152). Asv\_016\_00003 and 00113 were only 98.9% similar. An ASV (asv\_017\_00002) assigned  
167 to Cryptomonadales was also abundant in the 16S dataset, maybe corresponding to *G. cryophila* as well,  
168 since it is 99.5 % similar to a sequence from this species (AB073111), although it more similar to *Teleaulax*  
169 *amphioxeia* sequence (99.7 %).

170 The dominant taxa clearly varied depending on sample processing and the marker gene used (Figure 2,  
171 left panels). Filtered samples using the 18S rRNA gene were dominated by the diatoms *Minidiscus* sp., *P.*  
172 *glacialis*, *F. cylindrus*, *T. antarctica* and *T. minima*, the cryptophyte *G. cryophila*, an unknown pelagophyte,  
173 and *B. prasinus*. In sorted samples using the 18S rRNA gene, the dominant taxa were *P. antarctica*,  
174 followed by *M. polaris*, *Minidiscus* sp., *F. cylindrus*, *C. neogracilis* (which was much less abundant in  
175 filtered samples) and an unknown pelagophyte. Finally, filtered samples analyzed with 16S rRNA gene  
176 were dominated by species from the class Prymnesiophyceae (*Chrysochromulina* sp.) followed by the  
177 diatom *P. glacialis*, an unknown cryptophyte and *Minidiscus* sp.

178 We performed a more detailed analysis at the genus level to compute the number of taxa common  
179 to different approaches (Figure 3A). We focused on the summer 2015, the only period for which we  
180 have comparable datasets. For the filtered samples, we only considered the 0.2 and 3  $\mu$ m fractions for  
181 comparison with the sorted samples which do not include the microphytoplankton. The number of shared  
182 genera detected by the three approaches was low (15, Figure 3A). The number of genera only detected  
183 in one approach was highest for the 18S filter dataset (28, in particular diatoms), followed by 16S from



184 filters (8, in particular diatoms and Dictyochophyceae), and 18S from sorted samples (4, three diatoms  
185 and one pelagophyte).

## 186 **Community size structure**

187 In the larger size fractions (20  $\mu\text{m}$  for filtered samples and nano for sorted samples), diatoms were always  
188 dominant whatever the metabarcoding approach used (Figures 2 right side, and S2). In the smaller size  
189 fraction (0.2  $\mu\text{m}$  and pico), the composition was more dependent on the approach. For example, with both  
190 18S-filter and 18S-sort data, Mamiellophyceae were important but were almost absent in the 16S-filter data.  
191 In the filter data, Prymnesiophyceae were much more prevalent with 16S compared with 18S, especially  
192 in the two smaller fractions (Figure S2). An analysis of the genera common to different size fractions  
193 (Figure 3B) based on 18S reveals that more than 65% of the genera were found in the three size-fractions  
194 (53) suggesting that size fractionation is not very efficient at strictly separating phytoplankton communities.  
195 When looking at sorted samples (Figure 3C), the same observation prevailed as more than 55% of the  
196 genera were found in both pico and nano sorted fractions. This must be tempered however when looking  
197 at the abundance of each genus (Figure S2) with many genera abundant only in a single size fraction,  
198 although they may present in the other size fractions at low abundance. For example, although *Micromonas*  
199 was present in all filtered size fractions and sorted samples (Supplementary Data S2), it was only abundant  
200 in the smallest size fractions (Figure S2). Similarly *Porosira* sequences are found in all filtered size  
201 fractions (Supplementary Data S2) but dominant in the 20  $\mu\text{m}$  fraction and much lower in the 0.2  $\mu\text{m}$  one.

## 202 **Annual dynamics**

203 The dynamics of the phytoplankton community throughout the year could only be followed from the filtered  
204 samples since sorted samples were only obtained in summer 2015. The most abundant photosynthetic  
205 classes showed a clear seasonal pattern with year to year variation (Figures 4, S7 and S8). Focusing first  
206 on the 18S-filter dataset for which we have the largest number of samples, (Figures 4), we observed in the  
207 0.2  $\mu\text{m}$  size-fraction, a succession from Bacillariophyta in summer to Pelagophyceae and Cryptophyceae  
208 in the fall and spring, and then back to Bacillariophyta. The main species in this size fraction were  
209 *Minidiscus* sp. during summer, an unknown member of the Pelagophyceae during autumn and spring, and  
210 *G. cryophyla* during spring. The latter two taxa had also high abundance for the last samples taken in

211 summer 2015. Sequences assigned to Mamiellophyceae were detected throughout all the sampled dates  
212 in the 0.2  $\mu\text{m}$  size-fraction. *B. prasinus* was present in the fall and spring. In contrast *M. polaris* was  
213 most prevalent during the summer 2015. In the 3  $\mu\text{m}$  fraction, diatoms were only dominant during the  
214 summer and early fall while Cryptophyceae were abundant throughout spring 2014 and summer 2015  
215 and Pelagophyceae at the end of the fall and in the spring. In this size fraction, the dominant diatom  
216 was *Minidiscus* sp. followed by *F. cylindrus* and *T. minima*, and the dominant cryptophyte *G. cryophyla*.  
217 Finally in the 20  $\mu\text{m}$  fraction, diatoms were dominant throughout the year with the exception of the last  
218 sample taken in the fall (May 2014) in which pelagophytes peaked. In this fraction, it was the larger  
219 diatom *P. glacialis* which was contributing most, followed by *T. antarctica* and the smaller *Minidiscus*  
220 sp. Interestingly when looking at the summer, there was some year to year variation. For example,  
221 Cryptophyceae were abundant in the summer in 2015 but less so in 2014 while it was the reverse for  
222 Dictyochophyceae. The 16S-filter dataset is interesting because while confirming the 18S-filter data, it  
223 provides better insight into the seasonal dynamics of Prymnesiophyceae and Pyramimonadophyceae that  
224 are masked by other taxonomic groups in the latter dataset (Figure S7). Prymnesiophyceae, especially  
225 prevalent in the pico and nano-phytoplankton fractions, are present throughout the year with a peak in  
226 the fall while Pyramimonadophyceae, almost absent from the micro-phytoplankton, are restricted to the  
227 summer.

228 NMDS analysis based on Bray-Curtis dissimilarity for 18S-filter metabarcodes (Figure 5 top) shows  
229 that samples group together according to season and size fraction with summer samples displaying most  
230 scatter. Besides, taxa distribution also shows a seasonal variation, with Bacillariophyta as the dominant  
231 class in summer, while Prymnesiophyceae and Cryptophyceae more dominant in the other seasons. When  
232 available environmental parameters were fitted against the NMDS analysis, silica and nitrates appear as  
233 key factors to differentiate summer vs. spring and autumn. A similar clustering pattern was observed  
234 when using the plastidial 16S rRNA gene (Figure S9). Clustering based on either season or size fraction  
235 was supported by ANOSIM as highly significant and size fraction had a stronger clustering effect than  
236 season (Table S4).

## 237 Discussion

238 In this work, we assessed the variability in phytoplankton abundance, diversity, and community compo-  
239 sition during the austral year in a coastal area of the WAP by metabarcoding using two different genes:  
240 nuclear 18S rRNA and plastidial 16S rRNA. The community structure determined using these two markers  
241 displayed marked differences for some phytoplankton groups like Prymnesiophyceae, Pelagophyceae  
242 and Mamiellophyceae. Differences in sequencing results between marker genes have been noted before  
243 (Shi et al. 2011), and could be linked to primer bias, differences in amplification efficiency, variations  
244 in number of gene copies per genome (Needham and Fuhrman 2016), differences in number of plastid  
245 genome copies per cell resulting from differences in the number of chloroplasts per cell (Lin et al. 2019)  
246 or differential extraction yield for nuclear vs. plastidial DNA. These differences highlight the interest  
247 of using both gene markers for a more complete assessment of phytoplankton community composition.  
248 For example, the variation of Prymnesiophyceae and Pyramimonadophyceae over the year was easier to  
249 visualize with the 16S-filter dataset, while Mamiellophyceae significant contribution to the phytoplankton  
250 community was only evident on the 18S dataset.

251 These discrepancies point out that the use of different sample processing and marker genes allows  
252 to get a more complete image of phytoplankton communities. For example, some groups such as  
253 Prymnesiophyceae and Pyramimonadophyceae were more represented when using plastidial 16S versus  
254 nuclear 18S while Mamiellophyceae were almost absent from the 16S amplicon data. Pseudoscourfeldiales  
255 (Chlorophyta) only appeared in the 16S data. The uncultured marine Ochrophyta (MOCH, Massana et al.  
256 2014), described from environmental 18S rRNA sequences, was also only detected in the 18S data since  
257 no 16S rRNA sequences have been attributed to this uncultured clade (Supplementary Data S2).

## 258 Phytoplankton annual succession in Antarctic coastal waters

259 Phytoplankton composition in the WAP has been studied before (Kopczynska 2008; Lange et al. 2018),  
260 but many of these studies relied on optical microscopy and pigment analysis (Biggs et al. 2019; Leeuwe  
261 et al. 2020; Rozema et al. 2016; Wasilowska et al. 2015) and focused only on the summer period (Annett  
262 et al. 2010; Garibotti et al. 2003; Lima et al. 2019). Metabarcoding characterization in the WAP has been  
263 performed for samples from the PAL-TER, Fildes Bay (King George Island) and the RaTS (Luo et al. 2016;

264 Luria et al. 2014; Rozema et al. 2017). However, none of these studies investigated the structure of the  
265 phytoplankton community at different seasons. In the present study, succession of different phytoplankton  
266 groups through the Austral seasons was evident. Bacillariophyta (diatoms) dominated mainly in summer  
267 and early autumn in all fractions; Mamiellophyceae were present in the pico-phytoplankton fraction  
268 throughout the year; Pelagophyceae, Dictyochophyceae and, to a lesser extent, Cryptophyceae dominated  
269 late autumn and spring samples, while Prymnesiophyceae increased at the end of summer in the small size  
270 fraction.

271 The most abundant genera of diatoms included *Chaetoceros*, *Thalassiosira*, *Fragilariopsis*, *Minidiscus*  
272 and *Porosira*. These genera have been often observed in the WAP during summer months (Annett et al.  
273 2010; Lange et al. 2018), although the exact species may be different. For example, Garibotti et al.  
274 (2003) reported that different *Fragilariopsis* species could account together for up to 88% of diatom cell  
275 abundance at some sites in WAP during summer. In our study, the main species was *F. cylindrus* while *F.*  
276 *sublineata* was also present but much less abundant (Table S2). We failed to observe other *Fragilariopsis*  
277 species often associated to WAP spring/summer blooms, such as *F. pseudonana*, *F. ritscheri* and *F. curta*  
278 (Garibotti et al. 2003; Lee et al. 2015). *Minidiscus chilensis* has been previously reported at WAP (Lange  
279 et al. 2018) as a characteristic diatom of early-summer production, comprising a high proportion of  
280 phytoplankton biomass (Annett et al. 2010) and carbon transport to sea-floor (Kang et al. 2003). However,  
281 in contrast to the reported early-summer blooms of *Minidiscus* in Ryder Bay (Annett et al. 2010) and  
282 Bransfield Strait (Kang et al. 2003), we detected a high abundance of *Minidiscus* in our summer and early  
283 autumn samples.

284 In the pico-phytoplankton fraction, Mamiellophyceae were present throughout the year and dominated  
285 specific samples from autumn and summer, although the most abundant species, *M. polaris* has been  
286 rarely reported in Antarctic waters, in contrast to its dominance within the Arctic pico-phytoplankton  
287 (see next section). In the pico- and nano-phytoplankton fractions, Pelagophyceae became abundant after  
288 diatoms had decreased towards the end of autumn (Figure 4). Pelagophyceae is a class with only a few  
289 species described, mostly belonging to the pico-plankton size range (Vaulot et al. 2008), that was initially  
290 described from strains isolated in tropical and temperate waters (Andersen et al. 1993). However this  
291 class has been found later in polar environments (Balzano et al. 2012b; Diez et al. 2001; Luo et al. 2016)

292 and recently novel nano-plankton sized strains have been isolated from polar waters which probably  
293 correspond to several novel species (Balzano et al. 2012a; G erikas Ribeiro et al. 2020).

294 Within Prymnesiophyceae, the genus *Phaeocystis* is considered a key-player in Antarctic waters not  
295 only during the highly productive summer, but also during autumn and winter months (Sow et al. 2020).  
296 *P. antarctica* has a wide presence in the Southern Ocean (Gaebler et al. 2007) and is linked to increased  
297 carbon transport to deeper waters (Arrigo et al. 1999; DiTullio et al. 2000). An alternation between diatoms  
298 and *P. antarctica*, as reflected here in the 16S-filter prymnesiophytes (Figure S7), has been reported as a  
299 consequence to disturbances in the water column structure (Arrigo et al. 2000; Egas et al. 2017), as the  
300 latter benefits from deeper mixed layers and weakly stratified waters, due to its ability to maintain its  
301 photosynthetic rates in low light environments (Arrigo et al. 1999) and to quickly acclimate to different  
302 light regimes even under iron limitation (Van Leeuwe and Stefels 2007). The shift of prymnesiophytes  
303 from the 3 to the 20  $\mu\text{m}$  size fraction in the early summer and late fall 2014 (Figure S7) could be due to  
304 the formation of *Phaeocystis* colonies of large size that were retained by the 20  $\mu\text{m}$  filter. Differences  
305 observed between genomic 18S rRNA and plastidial 16S rRNA *Phaeocystis* read abundance might be a  
306 result of this photo-acclimation process, as an increased number of chloroplasts will result in an increased  
307 16S/18S rRNA ratio (Lin et al. 2019).

308 As light availability decreases towards autumn/winter, mixotrophy becomes a possible strategy for  
309 photosynthetic organisms to survive during the long period of darkness. Few studies however have been  
310 performed on this process (Gast et al. 2014). In the present study, three groups have been reported as  
311 possessing mixotrophic species: cryptophytes, dictyochophytes and Pyramimonadophyceae. Cryptophyte  
312 blooms are considered a secondary stage of the seasonal phytoplankton succession, developing after sea-ice  
313 edge diatom blooms, and may present a significant inter-annual variability at WAP, being favored by years  
314 of earlier sea-ice retreat (Garibotti et al. 2005). Our data are coherent with this pattern as cryptophytes were  
315 most abundant in the spring, when the sea-ice melts. Interestingly, they remained abundant in the summer  
316 of 2015 but not in 2014, pointing to some inter-annual variability. *G. cryophila* was the main cryptophyte  
317 species in this study, and has been determined to be mixotrophic (Gast et al. 2014). It has been previously  
318 reported at WAP (Egas et al. 2017), including as a dominant taxa (Luo et al. 2016), and has probably a  
319 circum-Antarctic distribution (Hoff et al. 2020), linked to warmer, nutrient-depleted post-bloom conditions

320 (Gast et al. 2014). Dictyochophyceae were most abundant in the spring under low light conditions. Some  
321 of the main ASVs were assigned to Pedinellales, which are known mixotrophs (Sekiguchi et al. 2003) and  
322 also to the genus *Florenciella*, which have been very recently determined to be mixotrophic feeding on  
323 bacteria as well as cyanobacteria (Li et al. 2020). In contrast, Pyramimonadophyceae which harbor several  
324 mixotrophic species (Gast et al. 2014; Maruyama and Kim 2013) were most abundant in the summer,  
325 suggesting that the occurring species were probably not mixotrophic.

### 326 **Antarctic vs. Arctic phytoplankton communities**

327 The Arctic and Antarctic marine ecosystems share many similarities due to the constraints of solar radiation  
328 input at high latitudes and a phytoplankton phenology connected to sea-ice formation and melting. This  
329 similarity is also seen at the taxonomic level, as many of the dominant taxa observed in the present study  
330 shared highly related or identical 18S rRNA sequences to Arctic species. Bipolarity has been long observed  
331 on planktonic marine organisms (Darling et al. 2000; Sul et al. 2013), and implies trans-equatorial genetic  
332 flow and organismal dispersal, mainly via ocean currents. Bipolar species might however thrive differently  
333 in the Arctic and Antarctic. In a study investigating bipolar protists based on 18S rRNA, Wolf et al. (2015)  
334 observed that only two OTUs that were not part of the rare biosphere, i.e. that accounted for more than 1%  
335 of total reads, were found in both poles: an unknown alveolate and *Micromonas*.

336 Although the dominant component of the picophytoplankton in Arctic waters in summer (Balzano et al.  
337 2012b; Lovejoy and Potvin 2011), *M. polaris* has been rarely reported from Antarctic waters (Delmont  
338 et al. 2015; Simmons et al. 2015), and even then, in low abundance (Luo et al. 2016; Rozema et al. 2016).  
339 In the present study *M. polaris* was detected in 42 samples, reaching up to 47% of photosynthetic reads  
340 in a single sample (Table S3). Two other *Micromonas* clades have been detected in Arctic or sub-Arctic  
341 waters, clade B3 (Tragin and Vaultot 2019), also detected here, and *M. commoda* clade A2 (Joli et al.  
342 2017). To the best of our knowledge, this is the first study to report this genus as a major player within the  
343 austral pico-phytoplankton. It is unclear if the unprecedented high abundance of *M. polaris* in Antarctic  
344 waters is related to a local and transient phenomena or part of a greater change associated with global  
345 climate patterns, since this species seems to be favored by increasing temperatures, enhanced water column  
346 stratification and ocean acidification (Benner et al. 2019; Hoppe et al. 2018; Li et al. 2009). We have also



347 detected a third *Micromonas* signature, which could potentially represent a novel Antarctic *Micromonas*  
348 clade (Figure S5). Another Mamiellophyceae, *B. prasinus*, is widely distributed in the world's oceans with  
349 two ecotypes reported so far which share identical 18S rRNA sequences but differ in their genomes and  
350 distribution (Vannier et al. 2016; Vaulot et al. 2012). In the present study, *B. prasinus* was abundant during  
351 autumn and spring, whereas *M. polaris* was more abundant during spring and summer. Interestingly,  
352 *Micromonas* clade B3 seems to follow seasonal dynamics that are closer to *B. prasinus* than to *M. polaris*.  
353 These seasonal dynamics seem to be analogous to what was observed in the Arctic, where a seasonal  
354 succession occurs between the two taxa with increased abundance of the *Bathycoccus* in winter (Joli et al.  
355 2017), possibly due to differences in loss rates, viral defense efficiency or mixotrophic activity between  
356 the two species.

357 The large centric diatom *Porosira glacialis*, which has a bipolar distribution, was the most abundant  
358 taxon in the present data set, mainly in the 20  $\mu\text{m}$  size fraction, reaching up to 74% of total reads in a  
359 given sample (Table S3). In the Arctic, *P. glacialis* has been reported as highly abundant in spring samples,  
360 co-occurring with *Thalassiosira gravida/antarctica* var. *borealis* (Kauko et al. 2018). A similar trend was  
361 observed in Antarctica, where *P. glacialis* was reported along with *T. antarctica* to make up to 90% of total  
362 phytoplankton biomass on King George Island during episodic events (Schloss et al. 2014). These diatoms  
363 are considered summer/autumn bloom species which share similar ecological preferences, being found  
364 together in diatom assemblages from paleontological samples (Świło et al. 2016). The alternation between  
365 *P. glacialis* and *T. antarctica* dominance seems to be linked to sea-ice concentration, as *P. glacialis* higher  
366 abundances are correlated to cooler environmental conditions (Pike et al. 2009). Although being often  
367 reported from both poles, Arctic and Antarctic strains of *P. glacialis* might differ in their 28S rRNA  
368 sequence, indicating a possible genetic divergence (Balzano et al. 2017).

369 *C. neogracilis* is a species complex with identical 18S rRNA gene, common in Arctic surface waters  
370 in the summer (Balzano et al. 2012b, 2017; Lovejoy and Potvin 2011). The *C. neogracilis* partial 18S  
371 rRNA sequence obtained in the present study is identical to a previously isolated *C. neogracilis* Antarctic  
372 strain (AnM0002), which is morphologically similar to, but phylogenetically distinct from, Arctic strains.  
373 Balzano et al. (2017) sequenced the full 18S rRNA gene of the AnM0002 strain and reported a 98.9%  
374 sequence identity with Arctic *C. neogracilis* strains, suggesting the former could be an undescribed



375 *Chaetoceros* species, possibly with an endemic Antarctic distribution.

376 *Thalassiosira* spp. is a well-known and important component of both Arctic (Luddington et al.  
377 2016) and Antarctic (Kopczynska 2008; Lange et al. 2018) phytoplankton communities. In the present  
378 study *T. minima* was the most conspicuous species among the genus *Thalassiosira*, observed in 49  
379 samples (Table S3). *T. minima* is considered a cosmopolitan species mostly observed in temperate waters  
380 (Hoppenrath et al. 2007; Luddington et al. 2016) and mostly excluded from polar regions except for one  
381 report in the Arctic Beaufort Sea (Balzano et al. 2017). Surprisingly, *T. minima* does not seem to have  
382 been reported in the Southern Ocean which could point out to a recent invasion linked to global change.

383 *Phaeocystis* is an ubiquitous genus, with a relatively well-defined biogeographic distribution for some  
384 species (Schoemann et al. 2005). *P. pouchetii* is mainly found in Arctic and *P. antarctica* in many regions  
385 of the Southern Ocean (Gaebler et al. 2007; Lange et al. 2002; Schoemann et al. 2005), while *P. globosa* is  
386 mostly found in temperate and tropical waters (Medlin et al. 1994). Although the main ASVs found in  
387 this study matched *P. antarctica* confirming many previous reports, we also found one ASV matching  
388 *P. pouchetii*, the Arctic species, and which was only found at depth (Table S2) suggesting that this latter  
389 species might be bipolar.

## 390 **Final considerations**

391 The WAP is undergoing accelerate environmental changes compared to the rest of Antarctic regions,  
392 being more susceptible to warming and sea-ice loss (Thompson and Solomon 2002) due to increased  
393 maritime influence (Smith and Stammerjohn 2001). The decreasing sea-ice extent in both time and  
394 space influences phytoplankton diversity and production (Rozema et al. 2016), highlighting the need for  
395 year-round ecological assessments of the phytoplankton structure and possible climate-related disturbances.  
396 The present study provides evidence that groups such as Mamiellophyceae and Pelagophyceae may have a  
397 greater ecological importance in the WAP than previously thought, and that a combination of methods are  
398 needed to investigate the full extent of phytoplankton diversity in this region.

## 399 **Methods**

### 400 **Study site and sampling**

401 Surface seawater samples (5 m) were collected from Fildes Bay, King George Island, Western Antarctic  
402 Peninsula (62 °12' 11"S, 58 °55' 15"W) using a 5 L Niskin bottle, in January, March, May, and October  
403 2014, and January 2015 (Table 1). In January 2015, vertical profiles were also obtained by sampling  
404 at 4 additional depths (15, 20, 25 and 50 m). Samples were prefiltered on board using a 100  $\mu\text{m}$  Nitex  
405 mesh, stored in sterile plastic carboys and kept in darkness until processing (less than 2 hours). Once  
406 in the laboratory, sub-samples for Chl *a*, flow cytometry, nutrients and molecular analyses were taken.  
407 Temperature (SST), salinity and PAR measurements were obtained using a CTD SBE 911 plus (SeaBird  
408 Electronics) equipped with an auxiliary biospherical PAR sensor.

### 409 **Nutrients**

410 Sub-samples of filtered seawater were collected in 15 mL polypropylene tubes and stored at -20 °C  
411 until analysis. Concentrations of nitrate  $\text{NO}^{-3}$ , phosphate  $\text{PO}_4^{-3}$  and silicate  $\text{SiO}_2^{-4}$  were determined as  
412 described previously (Hansen et al. 2012).

### 413 **Chlorophyll *a* determination**

414 Total Chl *a* was determined from triplicate 100 mL sub-samples. Biomass (<100  $\mu\text{m}$ ) was collected on 25  
415 mm diameter GF/F filters (Whatman) in the dark immediately after the samples arrived to the laboratory.  
416 Pigments were extracted in 90% acetone for 24 h at -20 °C and analysed on a Turner Designs Trilogy  
417 fluorometer, according to the method of Holm-Hansen *et al.* (1965). Calibration was made with a Chl *a*  
418 standard (Sigma-Aldrich).

### 419 **Phytoplankton cell counts by flow cytometry**

420 Sub-samples of 1.35 mL were taken in triplicates, fixed with 150  $\mu\text{l}$  of fixative (final concentrations:  
421 1% paraformaldehyde, 0.5% glutaraldehyde, 100 mM sodium borate, pH 8.4), incubated for 20 min at  
422 room temperature and fast frozen in liquid nitrogen. Cells were enumerated using an Accuri C6 Plus  
423 flow cytometer (Becton Dickinson) equipped with a combination of blue 488 nm and red 640 nm lasers.  
424 Photosynthetic pico-eukaryotes (PPE), photosynthetic nano-eukaryotes (PNE) and cryptophytes (CRY)

425 were differentiated by forward and side light scatters and trigger pulse width from the 488 nm laser, and  
426 red (>670 nm) and orange (585/40 nm) fluorescence detection from 488 and 640 nm laser. Each sample  
427 was run at an average flow rate of 81  $\mu\text{L min}^{-1}$  for 3 min. Flow rate was calculated by measuring the  
428 difference of volume of pre-filtered water after run for 10 minutes at the fast flow speed. Cell count  
429 analyses were performed using BD CSampler Plus software.

### 430 **Sorting by flow cytometry**

431 Samples (1.5 mL) for cell sorting by flow cytometry were collected in cryotubes with 10% DMSO (final  
432 concentration) and 0.01 % Pluronic F68 (final concentration) (Marie et al. 2014), flash-frozen in liquid  
433 nitrogen, and stored at  $-80^{\circ}\text{C}$  until analysis at the Station Biologique de Roscoff, France. Samples were  
434 analyzed and sorted using a FACSAria flow cytometer (Becton Dickinson, San Jose, CA). Photosynthetic  
435 pico and nanoeukaryotes populations were selected based on light scatter, orange phycoerythrin, and red  
436 chlorophyll fluorescence and sorted in purity mode, directly into Eppendorf tubes containing Tris-EDTA  
437 lysis buffer (Tris 10 mM, EDTA 1 mM, and 1.2% Triton, final concentration). Tris-HCl 50 mM, pH 8.0,  
438 NaCl 10 mM was used as sheath liquid. Sheath pressure was set at 70 PSI and nozzle frequency was 90  
439 KHz with a deflection voltage of 6,000 V. Sheath fluid samples were collected and analyzed as negative  
440 controls in all subsequent steps, including sequencing, to test for contamination in the flow sorting process  
441 (2018).

### 442 **Biomass collection and DNA extraction**

443 Samples of 4.5 L of seawater were serially size-fractionated using a peristaltic pump (Cole-Palmer) with  
444 47 mm diameter Swinnex filter holder (Millipore), and 20  $\mu\text{m}$  (Nylon, Millipore), 3  $\mu\text{m}$  and 0.2  $\mu\text{m}$   
445 (Poly-carbonate, Millipore) pore size filters. Filters were stored in 2 mL cryovials in liquid nitrogen or  
446 at  $-80^{\circ}\text{C}$  until DNA extraction. For DNA extraction, filters were thawed and half of the filters were cut  
447 into small pieces, while the other half was kept at  $-20^{\circ}\text{C}$  as backup. All steps were performed under  
448 sterile conditions. Each half-filter was incubated in lysis buffer (TE 1x / NaCl 0.15 M), with 10% SDS  
449 and 20  $\text{mg mL}^{-1}$  proteinase K at  $37^{\circ}\text{C}$  for 1 h. DNA was extracted using 5 M NaCl and hexadecyl-  
450 trimethyl-ammonium bromide (CTAB) extraction buffer (10% CTAB, 0.7% NaCl) and incubated at  $65^{\circ}\text{C}$   
451 for 10 min before protein removal using a conventional phenol- chloroform method. DNA was precipitated

452 using ethanol at  $-20^{\circ}\text{C}$  for 1 h and re-suspended in  $50\ \mu\text{l}$  Milli-Q water (Millipore) (Egas et al. 2017).  
453 DNA integrity was evaluated by agarose gel electrophoresis and quantified using a fluorometric assay  
454 (Qubit 2.0 fluorometer).

### 455 **Metabarcoding of filtered samples**

456 For general eukaryotes, the V4 region of 18S rRNA gene was amplified using primer pair TAREuk454FWD1  
457 (CCAGCASCYGC GGTAATTCC) and V4 18S Next.Rev (ACTTTCGTTCTTGATYRATGA) (Piredda  
458 et al. 2017). For photosynthetic eukaryotes, plastidial 16S rRNA gene was amplified using primer pair  
459 Pla491F (GAGGAATAAGCATCGGCTAA, (Fuller et al. 2006)) and PP936R (CCTTTGAGTTTCAYYCTTGC)  
460 (<https://biomarks.eu/pp936r>). PCR reactions were performed in triplicate in  $50\ \mu\text{L}$  final volumes with Taq  
461 buffer 1X final concentration, 2 mM of  $\text{MgCl}_2$ , 0.2 mM of dNTPs, 0.2  $\mu\text{M}$  of each primer, 2.5 units of  
462 GoTaq Flexi DNA Polymerase (Fermelo) and approximately  $5\ \text{ng}\ \mu\text{l}^{-1}$  of DNA. Amplification conditions  
463 were 10 min of initial denaturation at  $94^{\circ}\text{C}$ , 30 cycles of  $94^{\circ}\text{C}$  for 45 s,  $57^{\circ}\text{C}$  (V4 18S rRNA) or  $62^{\circ}\text{C}$   
464 (16S rRNA) for 45 s and  $72^{\circ}\text{C}$  for 1.25 min, followed by a final extension of  $72^{\circ}\text{C}$  for 10 min. Amplicons  
465 were visualized on a 2% agarose gel (TAE 1X) and purified using the Wizard SV Gel and PCR Clean-Up  
466 System.

### 467 **Metabarcoding of sorted samples**

468 DNA from sorted cells was extracted by one cycle of freezing and thawing in liquid nitrogen a prior the  
469 PCR reaction. Because of the small number of cells collected (from to 500 to 6,500), sorted samples  
470 required a nested amplification with the first round of PCR done using the 18S rRNA gene primers 63F  
471 (ACGCTTGTCTCAAAGATTA) and 1818R (ACGGAAACCTTGTTACGA) (Lepère et al. 2011) with  
472 the following  $10\ \mu\text{L}$  mix:  $5\ \mu\text{L}$  KAPA HiFi HotStart ReadyMix 2x, 0.3  $\mu\text{M}$  final concentration of each  
473 primer,  $1\ \mu\text{L}$  of cells. Thermal conditions were:  $95^{\circ}\text{C}$  for 5 min, followed by 25 cycles of  $98^{\circ}\text{C}$  for 20  
474 s,  $52^{\circ}\text{C}$  for 30 s,  $72^{\circ}\text{C}$  for 90 s, and a final cycle of  $72^{\circ}\text{C}$  for 5 min. For the second round:  $12.5\ \mu\text{L}$   
475 KAPA HiFi HotStart ReadyMix 2x, 0.3  $\mu\text{M}$  final concentration of the same primers as described above  
476 (TAREuk454FWD1 and V4 18S Next.Rev),  $2.5\ \mu\text{L}$  of first round product and water for a  $25\ \mu\text{L}$  reaction.  
477 Thermal conditions were:  $95^{\circ}\text{C}$  for 3 min, followed by 25 cycles of  $98^{\circ}\text{C}$  for 20 s,  $65^{\circ}\text{C}$  for 1 min,  
478  $72^{\circ}\text{C}$ .

## 479 **Amplicon sequencing**

480 Amplicons were sequenced on an Illumina Miseq using a 250 cycles Miseq kit v.2 at the Genotoul GeT  
481 core facility (Toulouse, France) for filtered samples and at the GenoMer platform (Roscoff, France) for  
482 sorted samples. The final amplicon sequencing dataset (Table 2) contained 120 filtered samples (data set #  
483 16) and 40 sorted samples for the 18S rRNA gene (data set # 18), and 100 filtered for the plastidial 16S  
484 rRNA gene (data set # 17). See Supplementary Data S1 for list of samples. Data have been deposited to  
485 GenBank SRA under project numbers PRJNA645244 for 18S rRNA and PRJNA645261 for 16S rRNA.

## 486 **Sequence processing**

487 The three different datasets (16, 17 and 18) were processed independently. Primer sequences were first  
488 removed using cutadapt (Martin 2011). Amplicon processing was performed under the R software (R De-  
489 velopment Core Team 2013) using the dada2 package (Callahan et al. 2016) with the following parameters:  
490 truncLen and minLen = c(230, 230), truncQ = 2, maxEE = c(10, 10). Taxonomic assignment of ASVs was  
491 performed using the assignTaxonomy function from dada2 against the PR<sub>2</sub> database (Guillou et al. 2013)  
492 version 4.12 (<https://pr2-database.org/>) which contains both 18S rRNA and plastidial 16S rRNA reference  
493 sequences, the latter originating from a curated version of Phytoref (Decelle et al. 2015). We selected  
494 only ASVs corresponding to photosynthetic groups (divisions Chlorophyta, Cryptophyta, Rhodophyta,  
495 Haptophyta and Ochrophyta with the exception of Chrysophyceae, Bangiophyceae, Florideophyceae,  
496 Xanthophyceae and Phaeophyceae that are known to be either heterotrophic or only contain macroalgae).  
497 The number of photosynthetic ASVs and the average number of reads per dataset is provided in Table 2.

## 498 **Data analysis**

499 The following R packages were used for data analysis: *tidyr* for filtering and plotting, *treemapify* for  
500 treemaps, *phyloseq* (McMurdie and Holmes 2013) for heatmaps and NMDS, *vegan* for ANOSIM (ANalysis  
501 Of SIMilarity) and *upsetR* for upset plots. Samples were first normalized by the median sequencing depth.

## 502 **References cited**

- 503 Alcamán-Arias, M. E., L. Farías, J. Verdugo, T. Alarcón-Schumacher, and B. Díez (2018). Microbial  
504 activity during a coastal phytoplankton bloom on the Western Antarctic Peninsula in late summer.  
505 *FEMS Microbiology Letters* 365, 1–13.
- 506 Andersen, R. A., G. W. Saunders, M. P. Paskind, and J. Sexton (1993). Ultrastructure and 18S rRNA gene  
507 sequence for *Pelagomonas calceolata* gen. and sp. nov. and the description of a new algal class, the  
508 Pelagophyceae *classis nov.* *Journal of Phycology* 29, 701–715.
- 509 Annett, A. L., D. S. Carson, X. Crosta, A. Clarke, and R. S. Ganeshram (2010). Seasonal progression of  
510 diatom assemblages in surface waters of Ryder Bay, Antarctica. *Polar Biology* 33, 13–29.
- 511 Arrigo, K. R., G. R. DiTullio, R. B. Dunbar, D. H. Robinson, M. VanWoert, D. L. Worthen, and M. P.  
512 Lizotte (2000). Phytoplankton taxonomic variability in nutrient utilization and primary production in  
513 the Ross Sea. *Journal of Geophysical Research: Oceans* 105, 8827–8846.
- 514 Arrigo, K. R., D. H. Robinson, D. L. Worthen, R. B. Dunbar, G. R. DiTullio, M. VanWoert, and M. P.  
515 Lizotte (1999). Phytoplankton community structure and the drawdown of nutrients and CO<sub>2</sub> in the  
516 Southern Ocean. *Science* 283, 365–367.
- 517 Assmy, P. et al. (2017). Leads in Arctic pack ice enable early phytoplankton blooms below snow-covered  
518 sea ice. *Scientific Reports* 7, 1–9.
- 519 Balzano, S., P. Gourvil, R. Siano, M. Chanoine, D. Marie, S. Lessard, D. Sarno, and D. Vaultot (2012a).  
520 Diversity of cultured photosynthetic flagellates in the North East Pacific and Arctic Oceans in summer.  
521 *Biogeosciences* 9, 4553–4571.
- 522 Balzano, S., D. Marie, P. Gourvil, and D. Vaultot (2012b). Composition of the summer photosynthetic pico  
523 and nanoplankton communities in the Beaufort Sea assessed by T-RFLP and sequences of the 18S  
524 rRNA gene from flow cytometry sorted samples. *The ISME journal* 6, 1480–1498.
- 525 Balzano, S., I. Percopo, R. Siano, P. Gourvil, M. Chanoine, D. Marie, D. Vaultot, and D. Sarno (2017). Mor-  
526 phological and genetic diversity of Beaufort Sea diatoms with high contributions from the *Chaetoceros*  
527 *neogracilis* species complex. *Journal of Phycology* 53, 161–187.

- 528 Benner, I., A. J. Irwin, and Z. Finkel (2019). Capacity of the common Arctic picoeukaryote *Micromonas*  
529 to adapt to a warming ocean. *Limnology and Oceanography Letters* 5, 221–227.
- 530 Biggs, T. E., S. Alvarez-Fernandez, C. Evans, K. D. Mojica, P. D. Rozema, H. J. Venables, D. W. Pond,  
531 and C. P. Brussaard (2019). Antarctic phytoplankton community composition and size structure:  
532 importance of ice type and temperature as regulatory factors. *Polar Biology* 42, 1997–2015.
- 533 Browning, T. J., H. a. Bouman, C. M. Moore, C. Schlosser, G. a. Tarran, E. M. S. Woodward, and  
534 G. M. Henderson (2014). Nutrient regimes control phytoplankton ecophysiology in the South Atlantic.  
535 *Biogeosciences* 11, 463–479.
- 536 Callahan, B. J., P. J. McMurdie, M. J. Rosen, A. W. Han, A. J. A. Johnson, and S. P. Holmes (2016).  
537 DADA2: High-resolution sample inference from Illumina amplicon data. *Nature Methods* 13, 581–583.
- 538 Clem, K. R., R. L. Fogt, J. Turner, B. R. Lintner, G. J. Marshall, J. R. Miller, and J. A. Renwick (2020).  
539 Record warming at the South Pole during the past three decades. *Nature Climate Change* 10, 762–770.
- 540 Darling, K. F., C. M. Wade, I. A. Stewart, D. Kroon, R. Dingle, and A. J. Leigh Brown (2000). Molecular  
541 evidence for genetic mixing of Arctic and Antarctic subpolar populations of planktonic foraminifers.  
542 *Nature* 405, 43–47.
- 543 Decelle, J., S. Romac, R. F. Stern, E. M. Bendif, A. Zingone, S. Audic, M. D. Guiry, L. Guillou, D. Tessier,  
544 F. Le Gall, P. Gourvil, A. L. Dos Santos, I. Probert, D. Vaultot, C. de Vargas, and R. Christen (2015).  
545 PhytoREF: A reference database of the plastidial 16S rRNA gene of photosynthetic eukaryotes with  
546 curated taxonomy. *Molecular Ecology Resources* 15, 1435–1445.
- 547 Delmont, T. O., K. M. Hammar, H. W. Ducklow, P. L. Yager, and A. F. Post (2014). *Phaeocystis antarctica*  
548 blooms strongly influence bacterial community structures in the Amundsen Sea polynya. *Frontiers in*  
549 *Microbiology* 5, 1–13.
- 550 Delmont, T. O., A. Murat Eren, J. H. Vineis, and A. F. Post (2015). Genome reconstructions indicate the  
551 partitioning of ecological functions inside a phytoplankton bloom in the Amundsen Sea, Antarctica.  
552 *Frontiers in Microbiology* 6, 1–19.
- 553 DiTullio, G. R., J. M. Grebmeier, K. R. Arrigo, M. P. Lizotte, D. H. Robinson, A. Leventer, J. P. Barry,  
554 M. L. VanWoert, and R. B. Dunbar (2000). Rapid and early export of *Phaeocystis antarctica* blooms  
555 in the Ross Sea, Antarctica. *Nature* 404, 595–598.



- 556 Díez, B., C. Pedrós-Alió, and R. Massana (2001). Study of Genetic Diversity of Eukaryotic Picoplankton  
557 in Different Oceanic Regions by Small-Subunit rRNA Gene Cloning and Sequencing. *Applied and*  
558 *Environmental Microbiology* 67, 2932–2941.
- 559 Egas, C., C. Henríquez-Castillo, N. Delherbe, E. Molina, A. Dos Santos, P. Lavin, R. De la Iglesia, D.  
560 Vaultot, and N. Trefault (2017). Short timescale dynamics of phytoplankton in Fildes Bay, Antarctica.  
561 *Antarctic Science* 29.
- 562 Fuller, N. J., C. Campbell, D. J. Allen, F. D. Pitt, F. Le Gall, D. Vaultot, and D. J. Scanlan (2006). Analysis  
563 of photosynthetic picoeukaryote diversity at open ocean sites in the Arabian Sea using a PCR biased  
564 towards marine algal plastids. *Aquatic Microbial Ecology* 43, 79–93.
- 565 Gaebler, S., P. K. Hayes, and L. K. Medlin (2007). Methods used to reveal genetic diversity in the colony-  
566 forming prymnesiophytes *Phaeocystis antarctica*, *P. globosa* and *P. pouchetii* — preliminary results.  
567 *Phaeocystis, Major Link in the Biogeochemical Cycling of Climate-Relevant Elements*. Houten, 330.
- 568 Garibotti, I., M. Vernet, M. Ferrario, R. Smith, R. Ross, and L. Quetin (2003). Phytoplankton spatial  
569 distribution patterns along the western Antarctic Peninsula (Southern Ocean). *Marine Ecology Progress*  
570 *Series* 261, 21–39.
- 571 Garibotti, I. A., M. Vernet, and M. E. Ferrario (2005). Annually recurrent phytoplanktonic assemblages  
572 during summer in the seasonal ice zone west of the Antarctic Peninsula (Southern Ocean). *Deep-Sea*  
573 *Research Part I: Oceanographic Research Papers* 52, 1823–1841.
- 574 Gast, R. J., Z. M. McKie-Krisberg, S. A. Fay, J. M. Rose, and R. W. Sanders (2014). Antarctic mixotrophic  
575 protist abundances by microscopy and molecular methods. *FEMS Microbiology Ecology* 89, 388–401.
- 576 Gérikas Ribeiro, C., A. Lopes dos Santos, P. Gourvil, F. Le Gall, D. Marie, M. Tragin, I. Probert, and  
577 D. Vaultot (2020). Culturable diversity of Arctic phytoplankton during pack ice melting. *Elementa:*  
578 *Science of the Anthropocene* 8, 6.
- 579 Gérikas Ribeiro, C., A. Lopes dos Santos, D. Marie, F. Pereira Brandini, and D. Vaultot (2018). Small  
580 eukaryotic phytoplankton communities in tropical waters off Brazil are dominated by symbioses  
581 between Haptophyta and nitrogen-fixing cyanobacteria. *The ISME Journal* 12, 1360–1374.

- 582 Guillou, L. et al. (2013). The Protist Ribosomal Reference database (PR<sup>2</sup>): a catalog of unicellular  
583 eukaryote Small Sub-Unit rRNA sequences with curated taxonomy. *Nucleic Acids Research* 41, D597–  
584 D604.
- 585 Hansen, M. O., T. G. Nielsen, C. A. Stedmon, and P. Munk (2012). Oceanographic regime shift during  
586 1997 in Disko Bay, Western Greenland. *Limnology and Oceanography* 57, 634–644.
- 587 Hoff, J. van den, E. Bell, and L. Whittock (2020). Dimorphism in the Antarctic cryptophyte *Geminigera*  
588 *cryophila* (Cryptophyceae). *Journal of Phycology*, 1–11.
- 589 Holm-Hansen, O., C. J. Lorenzen, R. W. Holmes, and J. D. H. Strickland (1965). Fluorometric Determina-  
590 tion of Chlorophyll. *ICES Journal of Marine Science* 30, 3–15.
- 591 Hoppe, C. J. M., C. M. Flintrop, and B. Rost (2018). The arctic picoeukaryote *Micromonas pusilla* benefits  
592 synergistically from warming and ocean acidification. *Biogeosciences* 15, 4353–4365.
- 593 Hoppenrath, M., B. Beszteri, G. Drebes, H. Halliger, J. E. Van Beusekom, S. Janisch, and K. H. Wiltshire  
594 (2007). *Thalassiosira* species (Bacillariophyceae, Thalassiosirales) in the North Sea at Helgoland  
595 (German Bight) and Sylt (North Frisian Wadden Sea) - A first approach to assessing diversity. *European*  
596 *Journal of Phycology* 42, 271–288.
- 597 Jeong, H. J., Y. D. Yoo, J. S. Kim, K. A. Seong, N. S. Kang, and T. H. Kim (2010). Growth, feeding and  
598 ecological roles of the mixotrophic and heterotrophic dinoflagellates in marine planktonic food webs.  
599 *Ocean Science Journal* 45, 65–91.
- 600 Joli, N., A. Monier, R. Logares, and C. Lovejoy (2017). Seasonal patterns in Arctic prasinophytes and  
601 inferred ecology of Bathycoccus unveiled in an Arctic winter metagenome. *ISME Journal* 6, 1372–  
602 1385.
- 603 Kang, J. S., S. H. Kang, D. Kim, and D. Y. Kim (2003). Planktonic centric diatom *Minidiscus chilensis*  
604 dominated sediment trap material in eastern Bransfield Strait, Antarctica. *Marine Ecology Progress*  
605 *Series* 255, 93–99.
- 606 Kauko, H. M., L. M. Olsen, P. Duarte, I. Peeken, M. A. Granskog, G. Johnsen, M. Fernández-Méndez,  
607 A. K. Pavlov, C. J. Mundy, and P. Assmy (2018). Algal Colonization of Young Arctic Sea Ice in Spring.  
608 *Frontiers in Marine Science* 5, 1–20.

- 609 Kim, H., H. W. Ducklow, D. Abele, E. M. Barlett, A. G. Buma, M. P. Meredith, P. D. Rozema, O. M.  
610 Schofield, H. J. Venables, and I. R. Schloss (2018). Inter-decadal variability of phytoplankton biomass  
611 along the coastal West Antarctic Peninsula. *Philosophical Transactions of the Royal Society A:  
612 Mathematical, Physical and Engineering Sciences* 376.
- 613 Kopczyńska, E. (2008). Phytoplankton variability in Admiralty Bay, King George Island, South Shetland  
614 Islands: six years of monitoring. *Pol Polar Res* 29, 117–139.
- 615 Kuwata, A., K. Yamada, M. Ichinomiya, S. Yoshikawa, M. Tragin, D. Vaultot, and A. Lopes dos Santos  
616 (2018). Bolidophyceae, a Sister Picoplanktonic Group of Diatoms – A Review. *Frontiers in Marine  
617 Science* 5, 370.
- 618 Lange, M., Y. Q. Chen, and L. K. Medlin (2002). Molecular genetic delineation of *Phaeocystis* species  
619 (Prymnesiophyceae) using coding and non-coding regions of nuclear and plastid genomes. *European  
620 Journal of Phycology* 37, 77–92.
- 621 Lange, P. K., R. Ligowski, and D. R. Tenenbaum (2018). Phytoplankton in the embayments of King  
622 George Island (Antarctic Peninsula): A review with emphasis on diatoms. *Polar Record* 54, 158–175.
- 623 Lee, S. H., H. M. Joo, H. T. Joo, B. K. Kim, H. J. Song, M. Jeon, and S. H. Kang (2015). Large contribution  
624 of small phytoplankton at Marian Cove, King George Island, Antarctica, based on long-term monitoring  
625 from 1996 to 2008. *Polar Biology* 38, 207–220.
- 626 Leeuwe, M. A. van, A. L. Webb, H. J. Venables, R. J. Visser, M. P. Meredith, J. T. M. Elzenga, and  
627 J. Stefels (2020). Annual patterns in phytoplankton phenology in Antarctic coastal waters explained by  
628 environmental drivers. *Limnology and Oceanography* 65, 1651–1668.
- 629 Lepère, C., M. Demura, M. Kawachi, S. Romac, I. Probert, and D. Vaultot (2011). Whole Genome  
630 Amplification (WGA) of marine photosynthetic eukaryote populations. *FEMS Microbiology Ecology*  
631 76, 516–523.
- 632 Li, Q., K. F. Edwards, C. R. Schvarcz, K. E. Selph, and G. F. Steward (2020). Plasticity in the grazing  
633 ecophysiology of *Florenciella* (Dichtyochoephyceae), a mixotrophic nanoflagellate that consumes  
634 *Prochlorococcus* and other bacteria. *Limnology and Oceanography*, Ino.11585.
- 635 Li, W. K., F. A. McLaughlin, C. Lovejoy, and E. C. Carmack (2009). Smallest algae thrive as the Arctic  
636 Ocean freshens. *Science* 326, 539.

- 637 Lima, D. T. de, G. A. O. Moser, F. R. Piedras, L. C. da Cunha, D. R. Tenenbaum, M. M. B. Tenório,  
638 M. V. P. B. de Campos, T. d. O. Cornejo, and J. J. Barrera-Alba (2019). Abiotic Changes Driving  
639 Microphytoplankton Functional Diversity in Admiralty Bay, King George Island (Antarctica). *Frontiers*  
640 *in Marine Science* 6, 1–17.
- 641 Lin, Y., N. Cassar, A. Marchetti, C. Moreno, H. Ducklow, and Z. Li (2017). Specific eukaryotic plankton  
642 are good predictors of net community production in the Western Antarctic Peninsula. *Scientific Reports*  
643 7, 1–11.
- 644 Lin, Y., S. Gifford, H. Ducklow, O. Schofield, and N. Cassar (2019). Towards Quantitative Microbiome  
645 Community Profiling Using Internal Standards. *Applied and Environmental Microbiology* 85, 1–14.
- 646 Lovejoy, C. and M. Potvin (2011). Microbial eukaryotic distribution in a dynamic Beaufort Sea and the  
647 Arctic Ocean. *Journal of Plankton Research* 33, 431–444.
- 648 Luddington, I. A., C. Lovejoy, and I. Kaczmarek (2016). Species-rich meta-communities of the diatom  
649 order Thalassiosirales in the Arctic and northern Atlantic Ocean. *Journal of Plankton Research* 38,  
650 781–797.
- 651 Luo, W., H. Li, S. Gao, Y. Yu, L. Lin, and Y. Zeng (2016). Molecular diversity of microbial eukaryotes in  
652 sea water from Fildes Peninsula, King George Island, Antarctica. *Polar Biology* 39, 605–616.
- 653 Luria, C. M., H. W. Ducklow, and L. A. Amaral-Zettler (2014). Marine bacterial, archaeal and eukaryotic  
654 diversity and community structure on the continental shelf of the western Antarctic Peninsula. *Aquatic*  
655 *Microbial Ecology* 73, 107–121.
- 656 Marie, D., F. Rigaut-Jalabert, and D. Vaultot (2014). An improved protocol for flow cytometry analysis of  
657 phytoplankton cultures and natural samples. *Cytometry* 85, 962–968.
- 658 Marie, D., X. L. Shi, F. Rigaut-Jalabert, and D. Vaultot (2010). Use of flow cytometric sorting to better  
659 assess the diversity of small photosynthetic eukaryotes in the English Channel. *FEMS Microbiology*  
660 *Ecology* 72, 165–178.
- 661 Martin, M. (2011). Cutadapt removes adapter sequences from high-throughput sequencing reads. *EMB-*  
662 *net.journal* 17, 10–12.

- 663 Martinson, D. G., S. E. Stammerjohn, R. A. Iannuzzi, R. C. Smith, and M. Vernet (2008). Western  
664 Antarctic Peninsula physical oceanography and spatio-temporal variability. *Deep-Sea Research Part*  
665 *II: Topical Studies in Oceanography* 55, 1964–1987.
- 666 Maruyama, S. and E. Kim (2013). A Modern Descendant of Early Green Algal Phagotrophs. *Current*  
667 *Biology* 23, 1081–1084.
- 668 Massana, R., J. del Campo, M. E. Sieracki, S. Audic, and R. Logares (2014). Exploring the uncultured  
669 microeukaryote majority in the oceans: reevaluation of ribogroups within stramenopiles. *ISME Journal*  
670 8, 854–866.
- 671 McMurdie, P. J. and S. Holmes (2013). phyloseq: An R Package for Reproducible Interactive Analysis  
672 and Graphics of Microbiome Census Data. *PLOS ONE* 8, 1–11.
- 673 Medlin, L. K., M. Lange, and M. E. Baumann (1994). Genetic differentiation among three colony-forming  
674 species of *Phaeocystis*: Further evidence for the phylogeny of the Prymnesiophyta. *Phycologia* 33,  
675 199–212.
- 676 Moon-van der Staay, S. Y., R. De Wachter, and D. Vaulot (2001). Oceanic 18S rDNA sequences from  
677 picoplankton reveal unsuspected eukaryotic diversity. *Nature* 409, 607–610.
- 678 Moreno, C. M., Y. Lin, S. Davies, E. Monbureau, N. Cassar, and A. Marchetti (2018). Examination of  
679 gene repertoires and physiological responses to iron and light limitation in Southern Ocean diatoms.  
680 *Polar Biology* 41, 679–696.
- 681 Moreno-Pino, M., R. De la Iglesia, N. Valdivia, C. Henríquez-Castilo, A. Galán, B. Díez, and N. Trefault  
682 (2016). Variation in coastal Antarctic microbial community composition at sub-mesoscale: spatial  
683 distance or environmental filtering? *FEMS Microbiology Ecology* 92, fiw088.
- 684 Needham, D. M. and J. A. Fuhrman (2016). Pronounced daily succession of phytoplankton, archaea and  
685 bacteria following a spring bloom. *Nature microbiology* 1, 16005.
- 686 Pike, J., X. Crosta, E. J. Maddison, C. E. Stickley, D. Denis, L. Barbara, and H. Renssen (2009). Observa-  
687 tions on the relationship between the Antarctic coastal diatoms *Thalassiosira antarctica* Comber and  
688 *Porosira glacialis* (Grunow) Jørgensen and sea ice concentrations during the late Quaternary. *Marine*  
689 *Micropaleontology* 73, 14–25.

- 690 Piredda, R., M. P. Tomasino, A. M. D'Erchia, C. Manzari, G. Pesole, M. Montresor, W. H. C. F. Kooistra,  
691 D. Sarno, and A. Zingone (2017). Diversity and temporal patterns of planktonic protist assemblages at  
692 a Mediterranean Long Term Ecological Research site. *FEMS Microbiology Ecology* 93, fiw200.
- 693 R Development Core Team (2013). *R: A Language and Environment for Statistical Computing*.
- 694 Rozema, P. D., H. J. Venables, W. H. van de Poll, A. Clarke, M. P. Meredith, and A. G. Buma (2017).  
695 Interannual variability in phytoplankton biomass and species composition in northern Marguerite  
696 Bay (West Antarctic Peninsula) is governed by both winter sea ice cover and summer stratification.  
697 *Limnology and Oceanography* 62, 235–252.
- 698 Rozema, P. D., T. Biggs, P. A. Sprong, A. G. Buma, H. J. Venables, C. Evans, M. P. Meredith, and H.  
699 Bolhuis (2016). Summer microbial community composition governed by upper-ocean stratification  
700 and nutrient availability in northern Marguerite Bay, Antarctica. *Deep Sea Research Part II: Topical  
701 Studies in Oceanography* 139, 151–166.
- 702 Schloss, I. R., A. Wasilowska, D. Dumont, G. O. Almandoz, M. P. Hernando, C.-A. Michaud-Tremblay,  
703 L. Saravia, M. Rzepecki, P. Monien, D. Monien, E. E. Kopczyńska, A. V. Bers, and G. A. Ferreyra  
704 (2014). On the phytoplankton bloom in coastal waters of southern King George Island (Antarctica) in  
705 January 2010: An exceptional feature? *Limnology and Oceanography* 59, 195–210.
- 706 Schoemann, V., S. Becquevort, J. Stefels, V. Rousseau, and C. Lancelot (2005). *Phaeocystis* blooms in the  
707 global ocean and their controlling mechanisms: A review. *Journal of Sea Research* 53, 43–66.
- 708 Schofield, O., M. Brown, J. Kohut, S. Nardelli, G. Saba, N. Waite, and H. Ducklow (2018). Changes  
709 in the upper ocean mixed layer and phytoplankton productivity along the West Antarctic Peninsula.  
710 *Philosophical Transactions of the Royal Society A: Mathematical, Physical and Engineering Sciences*  
711 376.
- 712 Sekiguchi, H., M. Kawachi, T. Nakayama, and I. Inouye (2003). A taxonomic re-evaluation of the  
713 Pedinellales (Dictyochophyceae), based on morphological, behavioural and molecular data. *Phycologia*  
714 42, 165–182.
- 715 Shi, X. L., C. Lepère, D. J. Scanlan, and D. Vaultot (2011). Plastid 16S rRNA gene diversity among  
716 eukaryotic picophytoplankton sorted by flow cytometry from the South Pacific Ocean. *PLoS ONE* 6,  
717 e18979.



- 718 Sieburth, J. M., V. Smetacek, and J. Lenz (1978). Pelagic ecosystem structure: heterotrophic compartments  
719 of the plankton and their relationship to plankton size fractions. *Limnology and Oceanography* 23,  
720 1256–1263.
- 721 Simmons, M. P., C. Bachy, S. Sudek, M. J. Van Baren, L. Sudek, M. Ares, and A. Z. Worden (2015).  
722 Intron invasions trace algal speciation and reveal nearly identical arctic and antarctic *Micromonas*  
723 populations. *Molecular Biology and Evolution* 32, 2219–2235.
- 724 Smetacek, V. and S. Nicol (2005). Polar ocean ecosystems in a changing world. *Nature* 437, 362–368.
- 725 Smith, R. C. and S. E. Stammerjohn (2001). Variations of surface air temperature and sea-ice extent in the  
726 western Antarctic Peninsula region. *Annals of Glaciology* 33, 493–500.
- 727 Sow, L. S. S., T. W. Trull, and L. Bodrossy (2020). Oceanographic Fronts Shape *Phaeocystis* Assemblages:  
728 A High-Resolution 18S rRNA Gene Survey From the Ice-Edge to the Equator of the South Pacific.  
729 *Frontiers in Microbiology* 11, 1847.
- 730 Sul, W. J., T. A. Oliver, H. W. Ducklow, L. A. Amaral-Zettlera, and M. L. Sogin (2013). Marine bacteria  
731 exhibit a bipolar distribution. *Proceedings of the National Academy of Sciences of the United States of*  
732 *America* 110, 2342–2347.
- 733 Świło, M., W. Majewski, R. T. Minzoni, and J. B. Anderson (2016). Diatom assemblages from coastal  
734 settings of West Antarctica. *Marine Micropaleontology* 125, 95–109.
- 735 Thompson, D. W. and S. Solomon (2002). Interpretation of recent Southern Hemisphere climate change.  
736 *Science* 296, 895–899.
- 737 Tragin, M. and D. Vaultot (2019). Novel diversity within marine Mamiellophyceae (Chlorophyta) unveiled  
738 by metabarcoding. *Scientific Reports* 9, 5190.
- 739 Van Leeuwe, M. A. and J. Stefels (2007). Photosynthetic responses in *Phaeocystis antarctica* towards  
740 varying light and iron conditions. *Biogeochemistry*. Vol. 83, 61–70.
- 741 Vannier, T., J. Leconte, Y. Seeleuthner, S. Mondy, E. Pelletier, J.-M. Aury, C. de Vargas, M. Sieracki,  
742 D. Iudicone, D. Vaultot, P. Wincker, and O. Jaillon (2016). Survey of the green picoalga *Bathycoccus*  
743 genomes in the global ocean. *Scientific Reports* 6, 37900.
- 744 Vaultot, D., W. Eikrem, M. Viprey, and H. Moreau (2008). The diversity of small eukaryotic phytoplankton  
745 ( $\leq 3 \mu\text{m}$ ) in marine ecosystems. *FEMS Microbiology Reviews* 32, 795–820.



- 746 Vaulot, D., C. Lepère, E. Toulza, R. de la Iglesia, J. Poulain, F. Gaboyer, H. Moreau, K. Vandepoele,  
747 O. Ulloa, F. Gavory, and G. Piganeau (2012). Metagenomes of the Picoalga *Bathycoccus* from the  
748 Chile coastal upwelling. *PLoS ONE* 7.
- 749 Wasilowska, A., E. E. Kopczynska, and M. Rzepecki (2015). Temporal and spatial variation of phyto-  
750 plankton in Admiralty Bay, South Shetlands: the dynamics of summer blooms shown by pigment and  
751 light microscopy analysis. *Polar Biology* 38, 1249–1265.
- 752 Wilks, J. V. and L. K. Armand (2017). Diversity and taxonomic identification of *Shionodiscus* spp. in the  
753 Australian sector of the Subantarctic Zone. *Diatom Research* 0, 1–13.
- 754 Wolf, C., E. Kiliyas, and K. Metfies (2015). Protists in the polar regions: Comparing occurrence in the  
755 Arctic and Southern oceans using pyrosequencing. *Polar Research* 34, 23225.
- 756 Worden, A. Z., J. Janouskovec, D. McRose, A. Engman, R. M. Welsh, S. Malfatti, S. G. Tringe, and  
757 P. J. Keeling (2012). Global distribution of a wild alga revealed by targeted metagenomics. *Current*  
758 *biology* : *CB* 22, R675–R677.

## 759 **Acknowledgements**

760 This work was funded by INACH RG\_31-15 and INACH RT\_34-17 grants. Collaboration between  
761 Chile and France was funded through ECOS-CONICYT No. C16B02 and CNRS International Research  
762 Network "Diversity, Evolution and Biotechnology of Marine Algae" (GDRI No. 0803). The authors  
763 thank Dr. Ernesto Molina for sampling during autumn and spring, as well the logistic support at the  
764 scientific station Professor Julio Escudero, INACH. Adriana Lopes dos Santos was supported by the  
765 Singapore Ministry of Education, Academic Research Fund Tier 1 (RG26/19). We thank the Roscoff  
766 ABIMS platform of the FR2424 (CNRS, Sorbonne Université) for bioinformatics resources.

## 767 **Author contributions statement**

768 NT, RDI, ALS and DV designed the study. MM, RDI, ALS, DV and NT collected the samples. AC and  
769 DM performed the flow cytometry analysis. MM, RDI, ALS, RDI, CG, DV and NT performed the data  
770 analysis and interpretation. NT, RDI, ALS, CG and DV wrote the paper. All authors read and approved  
771 the final manuscript.

## 772 **Additional information**

773 **Accession codes:** GenBank project numbers PRJNA645244 and PRJNA645261.

774 **Code and processed data:** <https://github.com/vaulot/Paper-Trefault-2020-Antarctica>

775 **Competing interests** The authors declare no competing financial interests.

## 776 **List of Tables**

- 777 **Table. 1** Samples collected. CTD corresponds to salinity and temperature data from CTD  
778 cast, Chl to Chlorophyll *a*, FCM to flow cytometry and Profile to vertical profile  
779 sampling. 18S and 16S rRNA columns correspond to metabarcoding analyses for  
780 nuclear 18S and plastidial 16S rRNA gene.
- 781 **Table. 2** Summary of the metabarcoding data sets analyzed. ID corresponds to the dataset  
782 identifier. "Photo ASVs" and "Photo reads" corresponds to the number of ASVs  
783 and the mean number of reads assigned to photosynthetic taxa.
- 784 **Table. S1** Metadata available for the vertical profile samples of January 16, 2015. PPE, PNE,  
785 CRY corresponds to abundance of photosynthetic pico-eukaryotes, nano-eukaryotes  
786 and cryptophytes, respectively, in cell mL<sup>-1</sup>.
- 787 **Table. S2** List of species in the metabarcoding data sets only found in the deep samples (from  
788 10 to 50 m).
- 789 **Table. S3** List of species found in the metabarcoding data sets for the surface samples. Mini-  
790 mum (min), mean (mean) and Maximum (max) contribution (in %) to the photosyn-  
791 thetic metabarcodes and the number of samples (n) where found for the 18S-filter,  
792 16S-filter and 18S-sort datasets.
- 793 **Table. S4** ANOSIM analysis for surface samples contrasting the effect of season or size-  
794 fraction.

**Table 1.** Samples collected. CTD corresponds to salinity and temperature data from CTD cast, Chl to Chlorophyll *a*, FCM to flow cytometry and Profile to vertical profile sampling. 18S and 16S rRNA columns correspond to metabarcoding analyses for nuclear 18S and plastidial 16S rRNA gene.

| Date        | Season | CTD | Chl | FCM | Nutrients | Profile | 18S rRNA filter   |                 |                  | 16S rRNA filter   |                 |                  | 18S rRNA sort |      |
|-------------|--------|-----|-----|-----|-----------|---------|-------------------|-----------------|------------------|-------------------|-----------------|------------------|---------------|------|
|             |        |     |     |     |           |         | 0.2 $\mu\text{m}$ | 3 $\mu\text{m}$ | 20 $\mu\text{m}$ | 0.2 $\mu\text{m}$ | 3 $\mu\text{m}$ | 20 $\mu\text{m}$ | Pico          | Nano |
| Jan 10 2014 | Summer | +   | +   | +   | +         | -       | -                 | +               | +                | +                 | -               | +                | -             | -    |
| Jan 11 2014 | Summer | +   | +   | +   | +         | -       | +                 | +               | +                | +                 | +               | +                | -             | -    |
| Jan 16 2014 | Summer | +   | +   | +   | +         | -       | +                 | +               | +                | +                 | +               | +                | -             | -    |
| Jan 21 2014 | Summer | +   | +   | +   | +         | -       | +                 | +               | +                | +                 | +               | +                | -             | -    |
| Mar 10 2014 | Autumn | -   | +   | +   | +         | -       | -                 | +               | +                | -                 | +               | -                | -             | -    |
| Mar 11 2014 | Autumn | -   | +   | +   | +         | -       | +                 | +               | +                | -                 | +               | +                | -             | -    |
| Mar 13 2014 | Autumn | -   | +   | +   | +         | -       | +                 | +               | +                | -                 | +               | +                | -             | -    |
| Mar 14 2014 | Autumn | -   | +   | +   | +         | -       | +                 | +               | +                | -                 | -               | +                | -             | -    |
| May 8 2014  | Autumn | -   | +   | +   | +         | -       | +                 | +               | -                | -                 | +               | -                | -             | -    |
| May 9 2014  | Autumn | -   | +   | -   | +         | -       | +                 | -               | +                | -                 | -               | +                | -             | -    |
| May 10 2014 | Autumn | -   | +   | +   | +         | -       | +                 | +               | -                | +                 | +               | -                | -             | -    |
| Oct 30 2014 | Spring | -   | +   | +   | +         | -       | +                 | +               | -                | +                 | +               | -                | -             | -    |
| Oct 31 2014 | Spring | -   | +   | +   | +         | -       | +                 | +               | -                | -                 | +               | -                | -             | -    |
| Nov 1 2014  | Spring | -   | +   | +   | +         | -       | +                 | +               | -                | +                 | +               | +                | -             | -    |
| Jan 12 2015 | Summer | +   | -   | +   | -         | -       | +                 | +               | +                | +                 | +               | -                | +             | +    |
| Jan 13 2015 | Summer | +   | +   | +   | +         | +       | +                 | +               | +                | +                 | +               | +                | +             | +    |
| Jan 14 2015 | Summer | +   | +   | +   | +         | -       | +                 | -               | +                | -                 | +               | +                | +             | +    |
| Jan 16 2015 | Summer | +   | +   | +   | +         | +       | +                 | +               | +                | +                 | +               | +                | +             | +    |
| Jan 17 2015 | Summer | +   | +   | +   | +         | -       | -                 | +               | +                | -                 | +               | -                | +             | +    |
| Jan 18 2015 | Summer | +   | +   | +   | +         | +       | +                 | +               | +                | +                 | -               | +                | +             | +    |

**Table 2.** Summary of the metabarcoding data sets analyzed. ID corresponds to the dataset identifier. "Photo ASVs" and "Photo reads" corresponds to the number of ASVs and the mean number of reads assigned to photosynthetic taxa.

| ID | Gene                | Sample processing | Fractions                | Sample number | Photo ASVs | Photo reads (mean) |
|----|---------------------|-------------------|--------------------------|---------------|------------|--------------------|
| 16 | 18S rRNA nuclear    | filtered          | 0.2, 3, 20 $\mu\text{m}$ | 120           | 564        | 25494              |
| 17 | 16S rRNA plastidial | filtered          | 0.2, 3, 20 $\mu\text{m}$ | 100           | 357        | 34999              |
| 18 | 18S rRNA nuclear    | sorted            | pico, nano               | 40            | 189        | 31787              |

## 795 List of Figures

796 Fig. 1 Location of the sampling station in Fildes Bay, King George Island, Western  
797 Antarctic Peninsula (WAP) and biotic and abiotic characteristics between January  
798 2014 and January 2015. (A) Map of the Antarctica Peninsula and location of the  
799 station in Fildes Bay sampled in this study. (B) Phytoplankton abundance measured  
800 by flow cytometry. Detected populations correspond to PPE = photosynthetic pico-  
801 eukaryotes, PNE = photosynthetic nano-eukaryotes, and CRY = cryptophytes. (C)  
802 Nutrients ( silicate,  $\text{SiO}_3^{-2}$ ; nitrate,  $\text{NO}_3^-$  and phosphate,  $\text{PO}_4^{-3}$ ). (D) Chlorophyll *a*  
803 levels during the sampling period. Values correspond to  $< 100 \mu\text{m}$  biomass. For B,  
804 C, and D, values represent mean  $\pm$  standard deviation.

805 Fig. 2 Community composition of phytoplankton at species level for surface samples (5 m)  
806 at station 6 in Fildes Bay. Top panel: 18S rRNA gene for filtered samples. Middle  
807 panel: 18S rRNA gene for sorted samples. Bottom panel: plastidial 16S rRNA gene  
808 for filtered samples. Left side: abundance rank chart for major species. Right side:  
809 proportional area charts of relative abundance of classes by size fraction. 0.2, 3,  
810 and 20  $\mu\text{m}$  correspond to the 0.2-3, 3-20 and  $> 20 \mu\text{m}$  size fractions, respectively.

811 Fig. 3 (A) Number of genera in common between different metabarcoding approaches for  
812 samples of the 0.2-3 and 3-20  $\mu\text{m}$  size fractions, collected during summer 2015.  
813 (B) Number of genera in common between different size-fraction for all 18S rRNA  
814 gene samples. (C) Number of genera in common between different populations  
815 sorted by flow cytometry in summer 2015. Only taxonomic valid genera have been  
816 included.

817 Fig. 4 Relative abundance of the main phytoplankton groups at class (top) and genus  
818 (bottom) levels in Fildes Bay during the study period. The color scale of the  
819 heatmap correspond to the relative abundance of each taxon based on the 18S rRNA  
820 gene in filtered surface samples. Left: 0.2-3  $\mu\text{m}$ . Middle: 3-20  $\mu\text{m}$ . Right:  $> 20$   
821  $\mu\text{m}$ . Season delimitation corresponds to meteorological seasons.

- 822 Fig. 5 Non-metric multidimensional scaling (NMDS) analysis based on Bray-Curtis dis-  
823 similarities of the phytoplankton community composition (species) labeled by  
824 meteorological season (summer, autumn, and spring) and size fraction based of the  
825 18S gene of filtered samples. (Top) Samples. (Bottom) ASVs. Stress = 0.16.
- 826 Fig. S1 Community composition of phytoplankton at the class level along a vertical profile  
827 obtained on January 16, 2015, from 5 m and down to 50 m, based on the 18S rRNA  
828 gene for filtered samples.
- 829 Fig. S2 Relative abundance of the different genera in surface samples based on three  
830 different amplicon sequencing approaches for each size fraction. Left: 18S rRNA  
831 gene on filtered samples. Middle: 18S rRNA gene on sorted samples. Right:  
832 plastidial 16S rRNA gene on filtered samples.
- 833 Fig. S3 Sequence alignment of 18S rRNA ASVs for *Chaetoceros neogracilis* showing  
834 the differences between Arctic and Antarctic strains sequences. The ASVs from  
835 this study are identical to the Antarctic strain and show 7 bp differences to Arctic  
836 strains.
- 837 Fig. S4 Sequence alignment of 18S rRNA ASVs for major *Thalassiosira* and *Minidiscus*  
838 ASVs in comparison to reference sequences.
- 839 Fig. S5 Sequence alignment of 18S rRNA ASVs for *Micromonas* showing the clear signa-  
840 tures for *M. polaris* and clade B3 (Tragin and Vaultot 2019). Within *M. polaris* some  
841 sequences have a different signature pointing to a new clade specific of Antarctic  
842 waters (arrow).
- 843 Fig. S6 Sequence alignment of 18S rRNA ASVs for *Phaeocystis* showing the clear signa-  
844 tures for *P. antarctica* and *P. pouchetii*.
- 845 Fig. S7 Read numbers for the main photosynthetic taxonomic groups at the class level  
846 for plastidial 16S rRNA gene for filtered surface samples. The color scale of the  
847 heatmap corresponds to the normalized number of reads of each taxon. Season  
848 delimitation corresponds to meteorological seasons. Left: 0.2-3  $\mu\text{m}$ . Middle: 3-20  
849  $\mu\text{m}$ . Right: > 20  $\mu\text{m}$ .



850 Fig. S8 Read numbers for the main photosynthetic taxonomic groups at the class (Top) and  
851 genus (Bottom) levels of 18S rRNA gene for sorted samples from surface waters.  
852 The color scale of the heatmap corresponds to the normalized number of reads of  
853 each taxon. Left: pico size fraction. Right: nano size fraction.

854 Fig. S9 Non-metric multidimensional scaling (NMDS) analysis based on Bray-Curtis dis-  
855 similarities of the phytoplankton community composition (species) labeled by  
856 meteorological season and size fraction using the plastidial 16S rRNA gene. (A)  
857 Samples. (B) ASVs. Stress = 0.15.

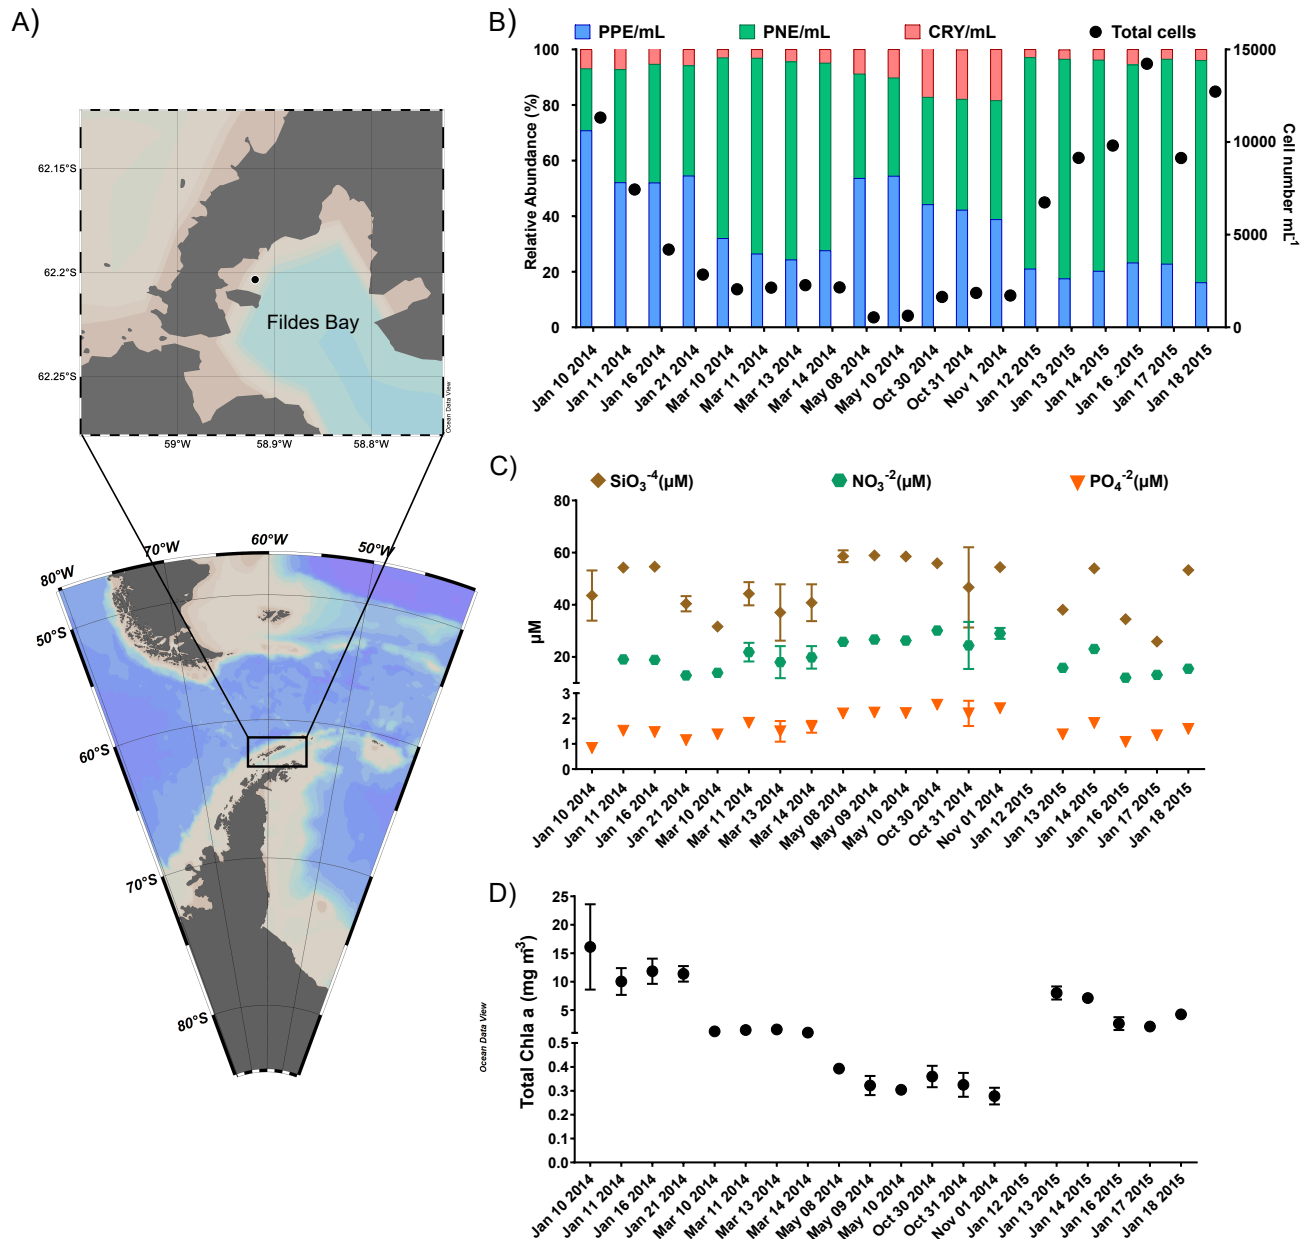

**Figure 1.** Location of the sampling station in Fildes Bay, King George Island, Western Antarctic Peninsula (WAP) and biotic and abiotic characteristics between January 2014 and January 2015. (A) Map of the Antarctica Peninsula and location of the station in Fildes Bay sampled in this study. (B) Phytoplankton abundance measured by flow cytometry. Detected populations correspond to PPE = photosynthetic pico-eukaryotes, PNE = photosynthetic nano-eukaryotes, and CRY = cryptophytes. (C) Nutrients ( silicate, SiO<sub>3</sub><sup>-2</sup>; nitrate, NO<sub>3</sub><sup>-</sup> and phosphate, PO<sub>4</sub><sup>-3</sup>). (D) Chlorophyll *a* levels during the sampling period. Values correspond to < 100 μm biomass. For B, C, and D, values represent mean ± standard deviation.

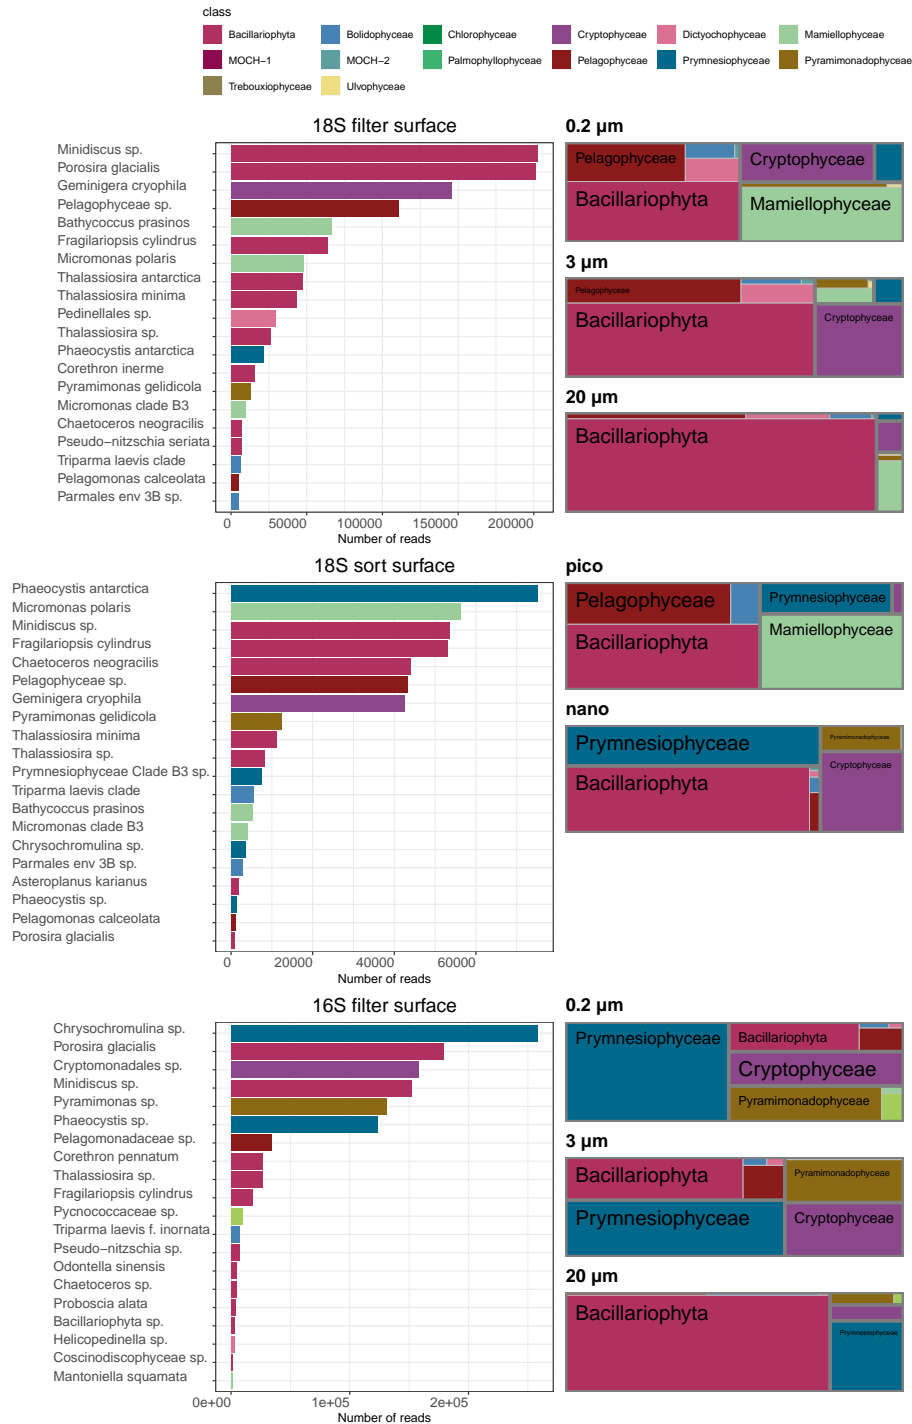

**Figure 2.** Community composition of phytoplankton at species level for surface samples (5 m) at station 6 in Fieldes Bay. Top panel: 18S rRNA gene for filtered samples. Middle panel: 18S rRNA gene for sorted samples. Bottom panel: plastidial 16S rRNA gene for filtered samples. Left side: abundance rank chart for major species. Right side: proportional area charts of relative abundance of classes by size fraction. 0.2, 3, and 20  $\mu\text{m}$  correspond to the 0.2-3, 3-20 and > 20  $\mu\text{m}$  size fractions, respectively.

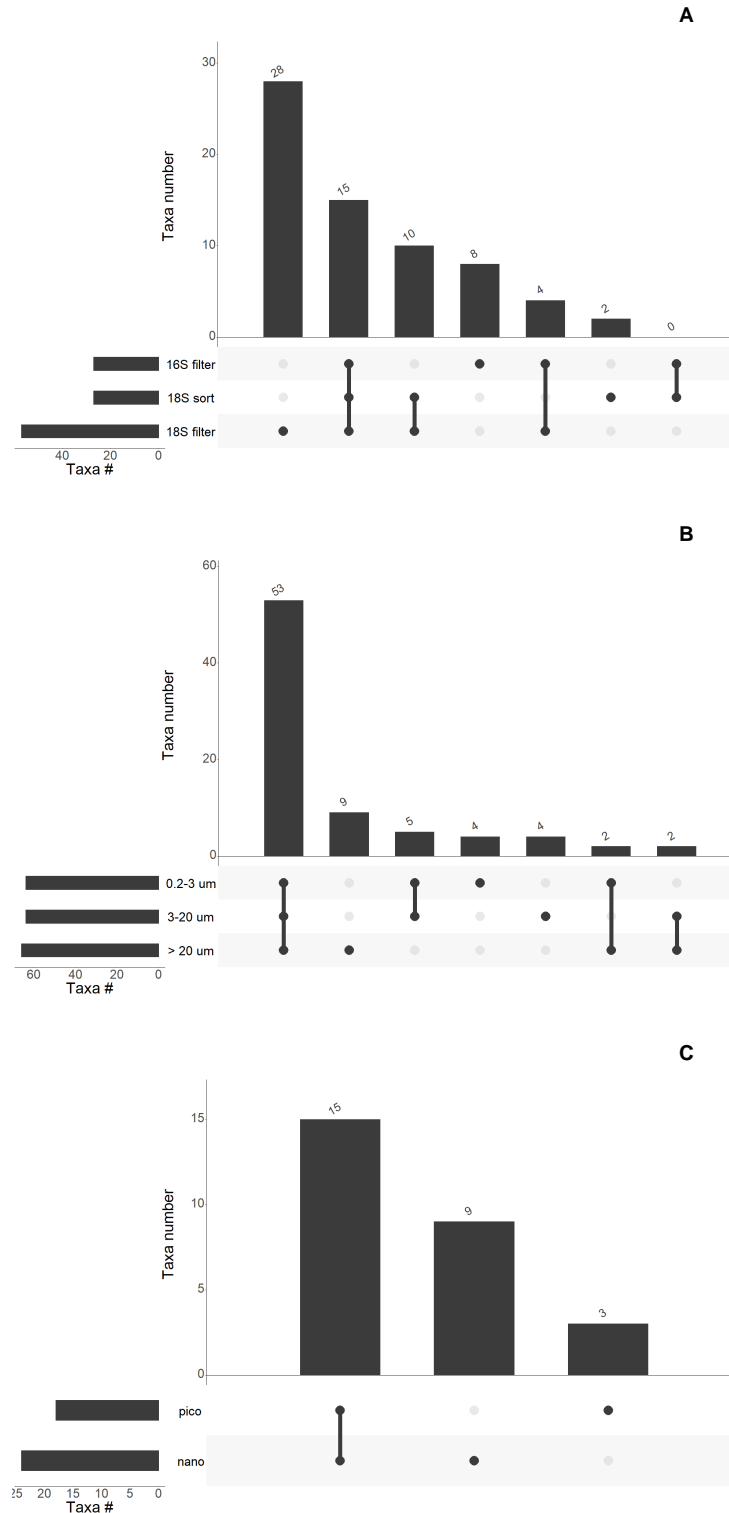

**Figure 3.** (A) Number of genera in common between different metabarcoding approaches for samples of the 0.2-3 and 3-20  $\mu$ m size fractions, collected during summer 2015. (B) Number of genera in common between different size-fraction for all 18S rRNA gene samples. (C) Number of genera in common between different populations sorted by flow cytometry in summer 2015. Only taxonomic valid genera have been included.

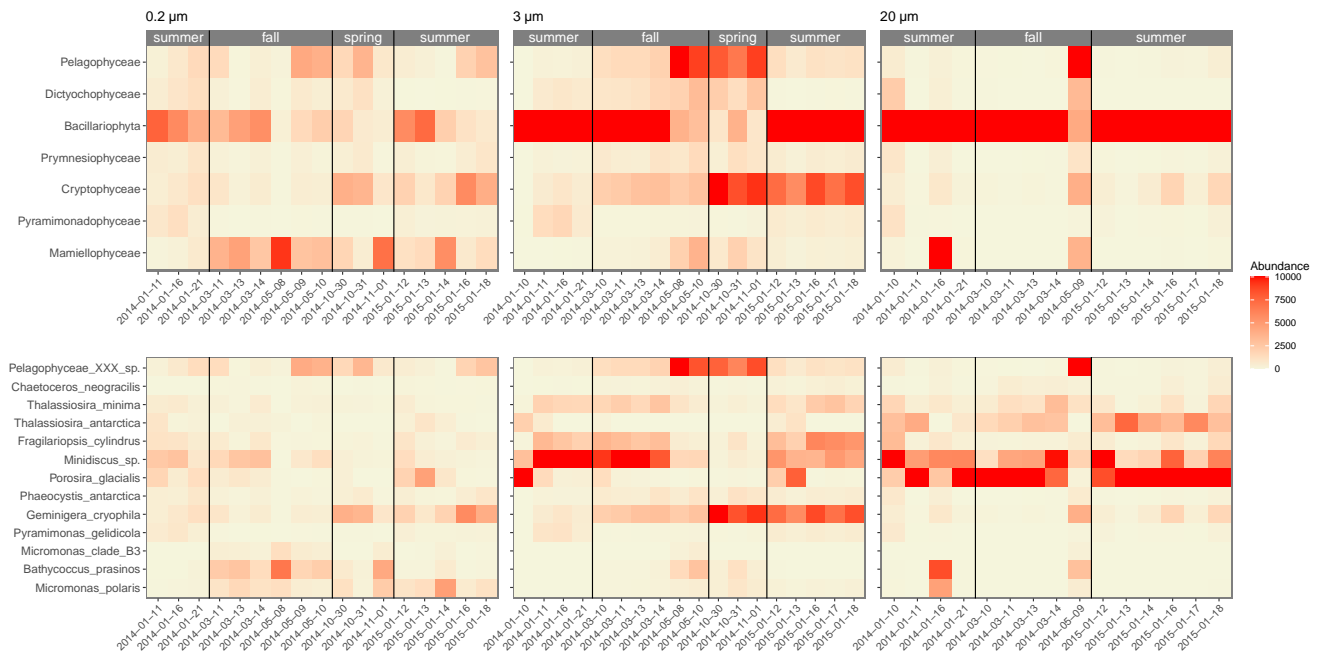

**Figure 4.** Relative abundance of the main phytoplankton groups at class (top) and genus (bottom) levels in Fildes Bay during the study period. The color scale of the heatmap correspond to the relative abundance of each taxon based on the 18S rRNA gene in filtered surface samples. Left: 0.2-3  $\mu\text{m}$ . Middle: 3-20  $\mu\text{m}$ . Right: > 20  $\mu\text{m}$ . Season delimitation corresponds to meteorological seasons.

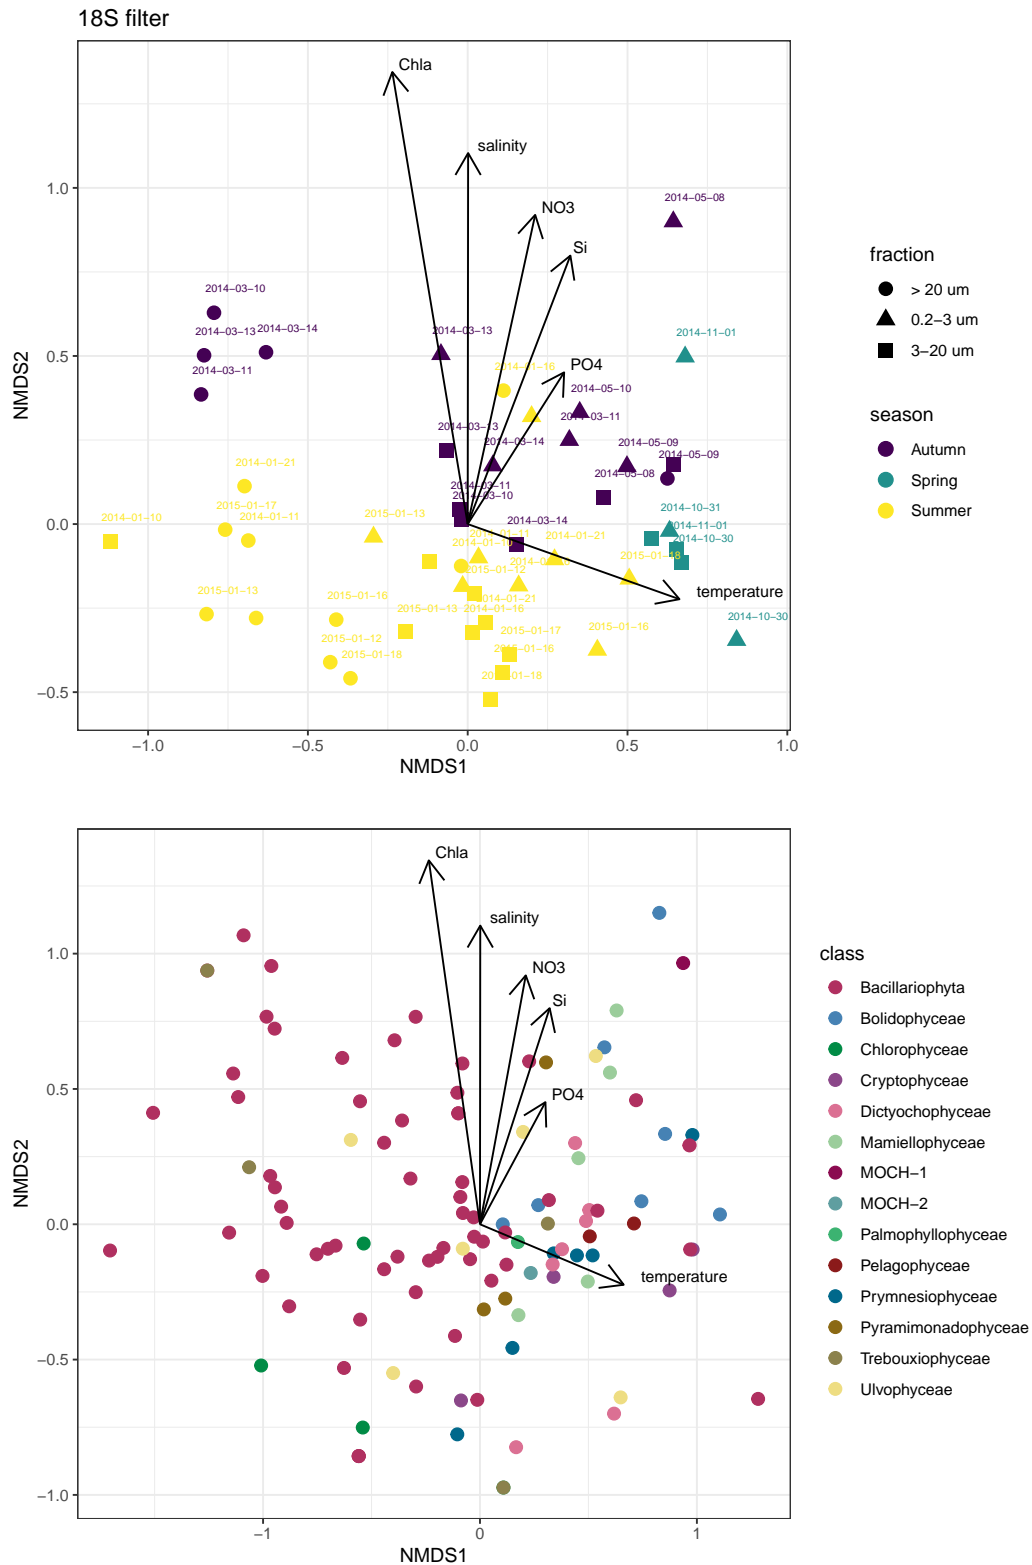

**Figure 5.** Non-metric multidimensional scaling (NMDS) analysis based on Bray-Curtis dissimilarities of the phytoplankton community composition (species) labeled by meteorological season (summer, autumn, and spring) and size fraction based of the 18S gene of filtered samples. (Top) Samples. (Bottom) ASVs. Stress = 0.16.

## 858 **Supplementary material**

### 859 **Supplementary Data**

860 All supplementary material is available at <https://github.com/vaulot/Paper-Trefault-2020-Antarctica>

- 861 • **Supplementary Data S1:** List of metabarcoding samples with environmental data  
862 (Antarctica\_2015\_samples.xlsx).
- 863 • **Supplementary Data S2:** List of classes, genera and species found by each metabarcoding approach  
864 in surface samples from summer 2015. Taxa with uncertain affiliation (labelled by \_X in the PR2  
865 database) were not taken into account (dada2/method\_comparison.xlsx).
- 866 • **Supplementary Data S3:** List of ASVs for 18S rRNA gene of filtered samples with abundance  
867 table for the different samples - see for sample codes in Supplementary Data S1  
868 (dada2/metapr2\_wide\_asv\_set\_16\_photo.xlsx).
- 869 • **Supplementary Data S4:** List of ASVs for plastidial 16S rRNA gene of filtered samples with  
870 abundance table for the different samples - see for sample codes in Supplementary Data S1  
871 (dada2/metapr2\_wide\_asv\_set\_17\_photo.xlsx).
- 872 • **Supplementary Data S5:** List of ASVs for plastidial 16S rRNA gene of filtered samples with  
873 abundance table for the different samples - see for sample codes in Supplementary Data S1  
874 (dada2/metapr2\_wide\_asv\_set\_18\_photo.xlsx).
- 875 • **Supplementary Data S6:** Script used to process the data with output (R markdown):  
876 <https://vaulot.github.io/Paper-Trefault-2020-Antarctica/Antarctica-phyloseq.html>.



**Table S1.** Metadata available for the vertical profile samples of January 16, 2015. PPE, PNE, CRY corresponds to abundance of photosynthetic pico-eukaryotes, nano-eukaryotes and cryptophytes, respectively, in cell mL<sup>-1</sup>.

| Depth (m) | T (°C) | PSU  | Chl-a | NO <sub>3</sub> <sup>-</sup> | NO <sub>2</sub> <sup>-</sup> | PO <sub>4</sub> <sup>-3</sup> | SiO <sub>4</sub> <sup>-4</sup> | PPE  | PNE   | CRY |
|-----------|--------|------|-------|------------------------------|------------------------------|-------------------------------|--------------------------------|------|-------|-----|
| 5         | 1.12   | 33.9 | 2.63  | 12.0                         | 0.28                         | 1.08                          | 34.5                           | 3301 | 10138 | 788 |
| 15        | 1.05   | 34.0 | 1.75  | 7.8                          | 0.20                         | 1.04                          | 20.4                           | 2605 | 6366  | 519 |
| 20        | 1.05   | 34.0 | 1.56  | 11.2                         | 0.25                         | 1.20                          | 33.2                           | 1960 | 6076  | 281 |
| 25        | 1.02   | 34.0 | 1.73  | 10.4                         | 0.20                         | 1.20                          | 32.0                           | 2115 | 5663  | 227 |
| 50        | 0.80   | 34.0 | 1.46  | 13.6                         | 0.25                         | 1.35                          | 34.4                           | 2130 | 5062  | 336 |

**Table S2.** List of species in the metabarcoding data sets only found in the deep samples (from 10 to 50 m).

| Division             | Class                           | Species                            |                            |
|----------------------|---------------------------------|------------------------------------|----------------------------|
| Chlorophyta          | Chlorophyceae                   | <i>Chlamydomonas acidophila</i>    |                            |
|                      |                                 | <i>Coccomyxa</i> sp.               |                            |
|                      |                                 | <i>Haematococcus zimbabwiensis</i> |                            |
|                      |                                 | <i>Hydrodictyon reticulatum</i>    |                            |
|                      |                                 | <i>Oophila amblystomatis</i>       |                            |
|                      |                                 | <i>Planophila</i> sp.              |                            |
|                      |                                 | <i>Radiococcus polycoccus</i>      |                            |
|                      |                                 | Trebouxiophyceae                   | <i>Chlorella mirabilis</i> |
|                      | <i>Chlorella sorokiniana</i>    |                                    |                            |
|                      | <i>Chlorella</i> sp.            |                                    |                            |
|                      | <i>Chlorella vulgaris</i>       |                                    |                            |
|                      | <i>Desmococcus endolithicus</i> |                                    |                            |
|                      | <i>Koliella sempervirens</i>    |                                    |                            |
|                      | <i>Stichococcus bacillaris</i>  |                                    |                            |
|                      | <i>Trebouxia</i> sp.            |                                    |                            |
|                      | Cryptophyta                     |                                    | Cryptophyceae              |
|                      |                                 | <i>Hemiselmis</i> sp.              |                            |
| <i>Teleaulax</i> sp. |                                 |                                    |                            |
| Haptophyta           | Prymnesiophyceae                | <i>Phaeocystis pouchetii</i>       |                            |
| Ochrophyta           | Bacillariophyta                 | <i>Amphora</i> sp.                 |                            |
|                      |                                 | <i>Bacillaria paxillifer</i>       |                            |
|                      |                                 | <i>Coscinodiscus jonesianus</i>    |                            |
|                      |                                 | <i>Gyrosigma limosum</i>           |                            |
|                      |                                 | <i>Navicula lanceolata</i>         |                            |
|                      |                                 | <i>Nitzschia dissipata</i>         |                            |
|                      |                                 | <i>Nitzschia</i> sp.               |                            |
|                      |                                 | <i>Pauliella toeniata</i>          |                            |
|                      |                                 | <i>Pinnularia microstauron</i>     |                            |
|                      |                                 | <i>Proboscia inermis</i>           |                            |
|                      |                                 | <i>Pseudo-nitzschia turgidula</i>  |                            |

| Division | Class            | Species                               |
|----------|------------------|---------------------------------------|
|          |                  | Rhizosolenia imbricata var shrubsolei |
|          |                  | Rhizosolenia setigera                 |
|          |                  | Synedropsis recta                     |
|          |                  | Tabularia sp.                         |
|          |                  | Tabularia tabulata                    |
|          |                  | Thalassionema nitzschioides           |
|          |                  | Thalassiosira nordenskiöldii          |
|          |                  | Ulnaria acus                          |
|          | Bolidophyceae    | Triparma mediterranea                 |
|          | Dictyochophyceae | Mesopedinella arctica                 |
|          |                  | Pseudochattonella verruculosa         |
|          |                  | Pteridomonas danica                   |

**Table S3.** List of species found in the metabarcoding data sets for the surface samples. Minimum (min), mean (mean) and Maximum (max) contribution (in %) to the photosynthetic metabarcodes and the number of samples (n) where found for the 18S-filter, 16S-filter and 18S-sort datasets.

| Division                    | Class               | Species                           | 18S rRNA filter |       |       |    | 16S rRNA plastid filter |       |       |    | 18S rRNA sort |       |       |    |
|-----------------------------|---------------------|-----------------------------------|-----------------|-------|-------|----|-------------------------|-------|-------|----|---------------|-------|-------|----|
|                             |                     |                                   | min             | mean  | max   | n  | min                     | mean  | max   | n  | min           | mean  | max   | n  |
| Chlorophyta                 | Chlorophyceae       | <i>Chlamydomonas hedleyi</i>      | 0.03            | 0.04  | 0.04  | 2  |                         |       |       |    |               |       |       |    |
|                             |                     | <i>Chlamydomonas kuwadae</i>      | 0.02            | 0.04  | 0.09  | 4  |                         |       |       |    |               |       |       |    |
|                             |                     | <i>Chlamydomonas raudensis</i>    | 0.01            | 0.01  | 0.01  | 1  |                         |       |       |    |               |       |       |    |
|                             |                     | <i>Pleurastrum</i> sp.            | 0.04            | 0.04  | 0.04  | 1  |                         |       |       |    |               |       |       |    |
|                             | Mamiellophyceae     | <i>Bathycoccus prasinos</i>       | 0.02            | 7.83  | 66.17 | 38 | 0.01                    | 0.21  | 0.83  | 10 | 1.08          | 2.40  | 4.32  | 8  |
|                             |                     | <i>Mantoniella squamata</i>       | 0.07            | 0.08  | 0.09  | 3  | 0.03                    | 0.31  | 1.33  | 12 |               |       |       |    |
|                             |                     | <i>Micromonas</i> clade B3        | 0.04            | 3.05  | 12.27 | 14 |                         |       |       |    | 0.14          | 2.08  | 4.04  | 7  |
|                             |                     | <i>Micromonas polaris</i>         | 0.01            | 5.08  | 46.68 | 42 |                         |       |       |    | 0.06          | 14.70 | 41.10 | 14 |
|                             | Palmophyllophyceae  | <i>Prasinoderma</i> coloniale     |                 |       |       |    | 0.01                    | 0.11  | 0.54  | 17 |               |       |       |    |
|                             |                     | <i>Prasinoderma</i> sp.           | 0.01            | 0.13  | 0.42  | 19 |                         |       |       |    | 0.16          | 0.16  | 0.16  | 1  |
|                             | Pyramimonadophyceae | <i>Pyramimonas australis</i>      | 0.01            | 0.52  | 4.21  | 33 |                         |       |       |    | 0.02          | 0.38  | 0.99  | 3  |
|                             |                     | <i>Pyramimonas disomata</i>       |                 |       |       |    | 0.00                    | 0.01  | 0.02  | 3  |               |       |       |    |
|                             |                     | <i>Pyramimonas gelidicola</i>     | 0.01            | 1.28  | 7.82  | 44 |                         |       |       |    | 0.92          | 5.68  | 10.20 | 8  |
|                             |                     | <i>Pyramimonas</i> sp.            |                 |       |       |    | 0.14                    | 11.31 | 36.88 | 40 |               |       |       |    |
|                             | Trebouxiophyceae    | <i>Chloroidium ellipsoideum</i>   | 0.02            | 0.02  | 0.02  | 1  |                         |       |       |    |               |       |       |    |
|                             |                     | <i>Chloroidium saccharophila</i>  | 0.04            | 0.04  | 0.04  | 1  |                         |       |       |    |               |       |       |    |
|                             |                     | <i>Prasiola crispa</i>            | 0.01            | 0.04  | 0.09  | 3  |                         |       |       |    |               |       |       |    |
|                             | Ulvophyceae         | <i>Acrochaete leptochaete</i>     | 0.00            | 0.06  | 0.24  | 15 |                         |       |       |    |               |       |       |    |
|                             |                     | <i>Acrosiphonia</i> sp.           |                 |       |       |    | 0.05                    | 0.05  | 0.05  | 1  |               |       |       |    |
|                             |                     | <i>Chlorothrix</i> sp.            | 0.04            | 0.20  | 0.61  | 16 |                         |       |       |    |               |       |       |    |
| <i>Dilabifilum</i> sp.      |                     | 0.01                              | 0.11            | 0.19  | 6     |    |                         |       |       |    |               |       |       |    |
| <i>Monostroma grevillei</i> |                     | 0.03                              | 0.16            | 0.56  | 13    |    |                         |       |       |    |               |       |       |    |
| <i>Ulothrix zonata</i>      |                     | 0.17                              | 0.17            | 0.17  | 1     |    |                         |       |       |    |               |       |       |    |
|                             |                     |                                   |                 |       |       |    |                         |       |       |    |               |       |       |    |
| Cryptophyta                 | Cryptophyceae       | <i>Falcomonas daucooides</i>      |                 |       |       |    |                         |       |       |    | 0.05          | 0.08  | 0.12  | 2  |
|                             |                     | <i>Falcomonas</i> sp.             | 0.01            | 0.01  | 0.01  | 2  |                         |       |       |    |               |       |       |    |
|                             |                     | <i>Geminigera cryophila</i>       | 0.04            | 13.05 | 56.48 | 50 | 0.01                    | 0.01  | 0.01  | 1  | 1.38          | 15.62 | 24.37 | 10 |
|                             |                     | <i>Hemiselmis tepida</i>          | 0.11            | 0.32  | 0.51  | 4  |                         |       |       |    |               |       |       |    |
|                             |                     | <i>Plagioselmis nannoplantica</i> | 0.05            | 0.18  | 0.31  | 2  |                         |       |       |    |               |       |       |    |
| Haptophyta                  | Prymnesiophyceae    | <i>Chrysochromulina</i> sp.       | 0.02            | 0.15  | 0.43  | 25 | 0.11                    | 22.96 | 80.47 | 39 | 0.65          | 1.61  | 2.56  | 8  |
|                             |                     | <i>Dicrateria</i> sp.             |                 |       |       |    | 0.01                    | 0.04  | 0.08  | 12 |               |       |       |    |
|                             |                     | <i>Phaeocystis antarctica</i>     | 0.03            | 2.04  | 8.22  | 47 |                         |       |       |    | 4.04          | 18.38 | 31.98 | 15 |
|                             |                     | <i>Phaeocystis cordata</i>        |                 |       |       |    | 0.01                    | 0.01  | 0.01  | 1  |               |       |       |    |
|                             |                     | <i>Phaeocystis</i> sp.            | 0.03            | 0.04  | 0.05  | 2  | 0.07                    | 10.94 | 48.49 | 39 | 0.68          | 1.53  | 2.53  | 3  |
|                             |                     | <i>Prymnesium parvum</i>          |                 |       |       |    | 0.02                    | 0.02  | 0.02  | 1  |               |       |       |    |
|                             |                     | <i>Prymnesium pigrum</i>          |                 |       |       |    | 0.01                    | 0.01  | 0.02  | 2  |               |       |       |    |
| Ochrophyta                  | Bacillariophyta     | <i>Achnanthes bongranii</i>       | 0.01            | 0.01  | 0.01  | 2  |                         |       |       |    |               |       |       |    |

| Division | Class | Species                          | 18S filter |      |       |    | 16S filter |      |       |    | 18S sort |       |       |    |  |  |
|----------|-------|----------------------------------|------------|------|-------|----|------------|------|-------|----|----------|-------|-------|----|--|--|
|          |       |                                  | min        | mean | max   | n  | min        | mean | max   | n  | min      | mean  | max   | n  |  |  |
|          |       | <i>Actinocyclus actinochilus</i> | 0.01       | 0.06 | 0.23  | 16 |            |      |       |    |          |       |       |    |  |  |
|          |       | <i>Actinocyclus curvatulus</i>   | 0.02       | 0.06 | 0.10  | 5  |            |      |       |    |          |       |       |    |  |  |
|          |       | <i>Amphora proteus</i>           | 0.02       | 0.11 | 0.54  | 11 |            |      |       |    |          |       |       |    |  |  |
|          |       | <i>Araphid-pennate</i> sp.       |            |      |       |    | 0.04       | 0.11 | 0.17  | 3  |          |       |       |    |  |  |
|          |       | <i>Asteromphalus</i> sp.         | 0.02       | 0.03 | 0.05  | 2  |            |      |       |    |          |       |       |    |  |  |
|          |       | <i>Asteroplanus karianus</i>     | 0.02       | 0.44 | 2.75  | 46 | 0.01       | 0.03 | 0.05  | 2  | 0.25     | 0.87  | 1.95  | 8  |  |  |
|          |       | <i>Chaetoceros danicus</i>       | 0.05       | 0.09 | 0.14  | 5  |            |      |       |    |          |       |       |    |  |  |
|          |       | <i>Chaetoceros debilis</i> 2     | 0.02       | 0.24 | 0.76  | 17 |            |      |       |    |          |       |       |    |  |  |
|          |       | <i>Chaetoceros dichæta</i>       | 0.04       | 0.14 | 0.31  | 6  |            |      |       |    |          |       |       |    |  |  |
|          |       | <i>Chaetoceros gelidus</i>       | 0.06       | 0.08 | 0.11  | 3  |            |      |       |    |          |       |       |    |  |  |
|          |       | <i>Chaetoceros neogræcilis</i>   | 0.05       | 0.68 | 1.83  | 46 |            |      |       |    | 0.06     | 13.43 | 35.09 | 12 |  |  |
|          |       | <i>Chaetoceros peruvianus</i>    | 0.00       | 0.01 | 0.02  | 3  |            |      |       |    |          |       |       |    |  |  |
|          |       | <i>Chaetoceros rostratus</i>     | 0.04       | 0.11 | 0.19  | 6  |            |      |       |    |          |       |       |    |  |  |
|          |       | <i>Chaetoceros socialis</i>      | 0.02       | 0.45 | 2.42  | 26 |            |      |       |    | 0.02     | 0.56  | 0.98  | 4  |  |  |
|          |       | <i>Chaetoceros</i> sp.           |            |      |       |    | 0.08       | 0.59 | 1.81  | 25 |          |       |       |    |  |  |
|          |       | <i>Cocconeis stauroneiformis</i> | 0.55       | 0.55 | 0.55  | 1  |            |      |       |    |          |       |       |    |  |  |
|          |       | <i>Conticribra weissflogii</i>   |            |      |       |    | 0.01       | 0.01 | 0.01  | 1  |          |       |       |    |  |  |
|          |       | <i>Corethron inerme</i>          | 0.02       | 1.37 | 8.39  | 50 |            |      |       |    |          |       |       |    |  |  |
|          |       | <i>Corethron pennatum</i>        |            |      |       |    | 0.02       | 3.25 | 53.08 | 28 |          |       |       |    |  |  |
|          |       | <i>Coscinodiscus concinnus</i>   | 0.03       | 0.03 | 0.03  | 1  |            |      |       |    |          |       |       |    |  |  |
|          |       | <i>Coscinodiscus</i> sp.         |            |      |       |    | 0.11       | 0.11 | 0.11  | 1  |          |       |       |    |  |  |
|          |       | <i>Cyclotella</i> sp.            |            |      |       |    | 0.05       | 0.05 | 0.05  | 1  |          |       |       |    |  |  |
|          |       | <i>Cylindrotheca closterium</i>  |            |      |       |    | 0.03       | 0.03 | 0.03  | 1  |          |       |       |    |  |  |
|          |       | <i>Cymatosira belgica</i>        |            |      |       |    | 0.04       | 0.04 | 0.04  | 1  |          |       |       |    |  |  |
|          |       | <i>Cymbella gastroides</i>       | 0.01       | 0.11 | 0.50  | 14 |            |      |       |    |          |       |       |    |  |  |
|          |       | <i>Cymbella laevis</i>           | 0.02       | 0.03 | 0.04  | 2  |            |      |       |    |          |       |       |    |  |  |
|          |       | <i>Cymbella salina</i>           | 0.04       | 0.04 | 0.04  | 1  |            |      |       |    |          |       |       |    |  |  |
|          |       | <i>Dickieia ulvacea</i>          | 0.02       | 0.02 | 0.02  | 1  |            |      |       |    |          |       |       |    |  |  |
|          |       | <i>Ditylum brightwellii</i>      |            |      |       |    | 0.02       | 0.02 | 0.02  | 1  |          |       |       |    |  |  |
|          |       | <i>Ditylum sol</i>               | 0.10       | 0.11 | 0.13  | 2  |            |      |       |    |          |       |       |    |  |  |
|          |       | <i>Encyonema</i> sp.             | 0.01       | 0.09 | 0.28  | 13 |            |      |       |    |          |       |       |    |  |  |
|          |       | <i>Eucampia antarctica</i>       | 0.02       | 0.19 | 0.68  | 18 |            |      |       |    |          |       |       |    |  |  |
|          |       | <i>Eucampia zodiacus</i>         |            |      |       |    | 0.02       | 0.05 | 0.07  | 2  |          |       |       |    |  |  |
|          |       | <i>Fragilariopsis cylindrus</i>  | 0.29       | 5.69 | 25.03 | 50 | 0.04       | 1.70 | 10.38 | 36 | 0.12     | 12.15 | 26.26 | 16 |  |  |
|          |       | <i>Fragilariopsis sublineata</i> | 0.11       | 0.28 | 0.53  | 17 |            |      |       |    | 0.54     | 0.62  | 0.77  | 3  |  |  |
|          |       | <i>Grammonema striatula</i>      | 0.01       | 0.05 | 0.16  | 8  |            |      |       |    |          |       |       |    |  |  |
|          |       | <i>Grammonema striatulum</i>     |            |      |       |    | 0.11       | 0.25 | 0.47  | 3  |          |       |       |    |  |  |
|          |       | <i>Guinardia delicatula</i>      | 0.02       | 0.03 | 0.04  | 3  |            |      |       |    |          |       |       |    |  |  |
|          |       | <i>Guinardia solstherfothii</i>  | 0.07       | 0.07 | 0.07  | 2  |            |      |       |    |          |       |       |    |  |  |
|          |       | <i>Haslea spicula</i>            | 0.01       | 0.12 | 0.34  | 19 |            |      |       |    |          |       |       |    |  |  |

| Division | Class | Species                           | 18S filter |       |       |    | 16S filter |       |       |    | 18S sort |       |       |    |
|----------|-------|-----------------------------------|------------|-------|-------|----|------------|-------|-------|----|----------|-------|-------|----|
|          |       |                                   | min        | mean  | max   | n  | min        | mean  | max   | n  | min      | mean  | max   | n  |
|          |       | <i>Hemiaulus sinensis</i>         | 0.03       | 0.10  | 0.19  | 7  |            |       |       |    |          |       |       |    |
|          |       | <i>Lauderia annulata</i>          |            |       |       |    | 0.01       | 0.01  | 0.01  | 1  |          |       |       |    |
|          |       | <i>Licmophora grandis</i>         | 0.06       | 0.19  | 0.53  | 7  |            |       |       |    |          |       |       |    |
|          |       | <i>Minidiscus</i> sp.             | 0.67       | 18.54 | 58.94 | 49 | 0.39       | 13.87 | 53.84 | 38 | 1.78     | 19.62 | 31.99 | 10 |
|          |       | <i>Minidiscus trioculatus</i>     | 0.18       | 1.54  | 2.83  | 5  |            |       |       |    |          |       |       |    |
|          |       | <i>Navicula perminuta</i>         | 0.01       | 0.01  | 0.01  | 1  |            |       |       |    |          |       |       |    |
|          |       | <i>Navicula phyllepta</i>         |            |       |       |    | 0.28       | 0.29  | 0.30  | 2  |          |       |       |    |
|          |       | <i>Navicula</i> sp.               | 0.04       | 0.16  | 0.55  | 9  |            |       |       |    |          |       |       |    |
|          |       | <i>Odontella aurita</i>           | 0.01       | 0.01  | 0.01  | 1  |            |       |       |    |          |       |       |    |
|          |       | <i>Odontella mobiliensis</i>      | 0.06       | 0.07  | 0.08  | 2  |            |       |       |    |          |       |       |    |
|          |       | <i>Odontella sinensis</i>         |            |       |       |    | 0.08       | 0.62  | 1.80  | 24 |          |       |       |    |
|          |       | <i>Phaeodactylum tricornutum</i>  |            |       |       |    | 0.13       | 0.13  | 0.13  | 1  |          |       |       |    |
|          |       | <i>Pleurosigma intermedium</i>    | 0.01       | 0.01  | 0.01  | 1  |            |       |       |    |          |       |       |    |
|          |       | <i>Podosira stelligera</i>        |            |       |       |    | 0.03       | 0.03  | 0.03  | 1  |          |       |       |    |
|          |       | <i>Porosira glacialis</i>         | 0.09       | 18.41 | 73.84 | 49 | 0.19       | 17.25 | 85.02 | 36 | 0.43     | 1.68  | 2.94  | 2  |
|          |       | <i>Porosira pseudodelicatula</i>  | 0.01       | 0.03  | 0.04  | 2  |            |       |       |    |          |       |       |    |
|          |       | <i>Porosira pseudodenticulata</i> | 0.01       | 0.01  | 0.02  | 2  |            |       |       |    |          |       |       |    |
|          |       | <i>Porosira</i> sp.               | 0.01       | 0.01  | 0.01  | 1  |            |       |       |    |          |       |       |    |
|          |       | <i>Proboscia alata</i>            | 0.02       | 0.24  | 0.92  | 22 | 0.02       | 0.47  | 1.95  | 28 |          |       |       |    |
|          |       | <i>Proboscia</i> sp.              |            |       |       |    | 0.03       | 0.03  | 0.03  | 1  |          |       |       |    |
|          |       | <i>Pseudo-nitzschia seriata</i>   | 0.03       | 0.82  | 4.80  | 36 |            |       |       |    | 0.06     | 0.40  | 0.88  | 3  |
|          |       | <i>Pseudo-nitzschia</i> sp.       |            |       |       |    | 0.07       | 1.23  | 11.39 | 20 | 0.20     | 0.77  | 1.33  | 2  |
|          |       | <i>Pseudogomphonema</i> sp.       | 0.02       | 0.09  | 0.28  | 7  |            |       |       |    |          |       |       |    |
|          |       | <i>Pteroncola inane</i>           | 0.01       | 0.03  | 0.05  | 5  |            |       |       |    |          |       |       |    |
|          |       | <i>Rhizosolenia fallax</i>        | 0.02       | 0.02  | 0.02  | 1  |            |       |       |    |          |       |       |    |
|          |       | <i>Shionodiscus ritscheri</i>     | 0.05       | 0.38  | 1.02  | 12 |            |       |       |    |          |       |       |    |
|          |       | <i>Skeletonema costatum</i>       |            |       |       |    | 0.01       | 0.01  | 0.01  | 1  |          |       |       |    |
|          |       | <i>Skeletonema</i> sp.            |            |       |       |    |            |       |       |    | 0.00     | 0.00  | 0.00  | 1  |
|          |       | <i>Stellarima microtrias</i>      | 0.01       | 0.03  | 0.08  | 8  | 0.46       | 0.46  | 0.46  | 1  |          |       |       |    |
|          |       | <i>Synedra hyperborea</i>         | 0.03       | 0.03  | 0.03  | 1  |            |       |       |    |          |       |       |    |
|          |       | <i>Synedropsis hyperborea</i>     |            |       |       |    | 0.04       | 0.04  | 0.04  | 1  |          |       |       |    |
|          |       | <i>Thalassionema frauenfeldii</i> | 0.07       | 0.07  | 0.07  | 2  | 0.02       | 0.11  | 0.25  | 4  |          |       |       |    |
|          |       | <i>Thalassiosira antarctica</i>   | 0.37       | 7.30  | 26.50 | 29 |            |       |       |    |          |       |       |    |
|          |       | <i>Thalassiosira minima</i>       | 0.18       | 3.96  | 11.46 | 49 |            |       |       |    | 0.12     | 3.12  | 9.40  | 13 |
|          |       | <i>Thalassiosira oceanica</i>     | 0.04       | 0.04  | 0.04  | 1  |            |       |       |    |          |       |       |    |
|          |       | <i>Thalassiosira oestrupii</i>    | 0.02       | 0.02  | 0.02  | 1  |            |       |       |    |          |       |       |    |
|          |       | <i>Thalassiosira rotula</i>       | 0.10       | 0.10  | 0.10  | 1  |            |       |       |    |          |       |       |    |
|          |       | <i>Thalassiosira</i> sp.          | 0.15       | 3.11  | 16.04 | 38 | 0.18       | 4.78  | 19.85 | 19 | 0.28     | 5.99  | 15.03 | 5  |
|          |       | <i>Thalassiosira tumida</i>       | 0.02       | 0.26  | 0.87  | 9  |            |       |       |    |          |       |       |    |
|          |       | <i>Thalassiothrix longissima</i>  | 0.01       | 0.08  | 0.21  | 7  |            |       |       |    |          |       |       |    |

| Division | Class            | Species                     | 18S filter |      |      |    | 16S filter |      |      |    | 18S sort |      |      |    |
|----------|------------------|-----------------------------|------------|------|------|----|------------|------|------|----|----------|------|------|----|
|          |                  |                             | min        | mean | max  | n  | min        | mean | max  | n  | min      | mean | max  | n  |
|          | Bolidophyceae    | Triparma laevis clade       | 0.03       | 0.56 | 2.70 | 49 |            |      |      |    | 0.05     | 2.01 | 7.85 | 10 |
|          |                  | Triparma laevis f. inornata |            |      |      |    | 0.06       | 0.69 | 2.36 | 37 |          |      |      |    |
|          |                  | Triparma pacifica           |            |      |      |    | 0.04       | 0.12 | 0.34 | 5  |          |      |      |    |
|          |                  | Triparma sp.                | 0.04       | 0.34 | 0.61 | 4  |            |      |      |    |          |      |      |    |
|          | Dictyochophyceae | Dictyocha speculum          | 0.05       | 0.11 | 0.25 | 4  |            |      |      |    |          |      |      |    |
|          |                  | Florenciella parvula        | 0.02       | 0.48 | 1.90 | 36 | 0.02       | 0.13 | 0.35 | 6  | 0.07     | 0.09 | 0.11 | 2  |
|          |                  | Helicopedinella sp.         |            |      |      |    | 0.01       | 0.38 | 1.74 | 23 |          |      |      |    |
|          |                  | Pseudochattonella farcimen  | 0.01       | 0.30 | 1.01 | 32 |            |      |      |    | 0.27     | 0.52 | 0.77 | 2  |
|          |                  | Pseudochattonella sp.       | 0.01       | 0.07 | 0.15 | 12 |            |      |      |    | 0.14     | 0.14 | 0.14 | 1  |
|          |                  | Pseudopedinella sp.         | 0.01       | 0.01 | 0.01 | 1  |            |      |      |    |          |      |      |    |
|          | Pelagophyceae    | Pelagomonas calceolata      | 0.04       | 1.12 | 2.66 | 21 |            |      |      |    | 0.22     | 0.93 | 1.37 | 4  |



**Table S4.** ANOSIM analysis for surface samples contrasting the effect of season or size-fraction.

| Data set   | Variable      | Statistics | <i>P</i> -value |
|------------|---------------|------------|-----------------|
| 18S filter | season        | 0.250      | 0.001           |
|            | size fraction | 0.376      | 0.001           |
| 16S filter | season        | 0.216      | 0.010           |
|            | size fraction | 0.412      | 0.001           |

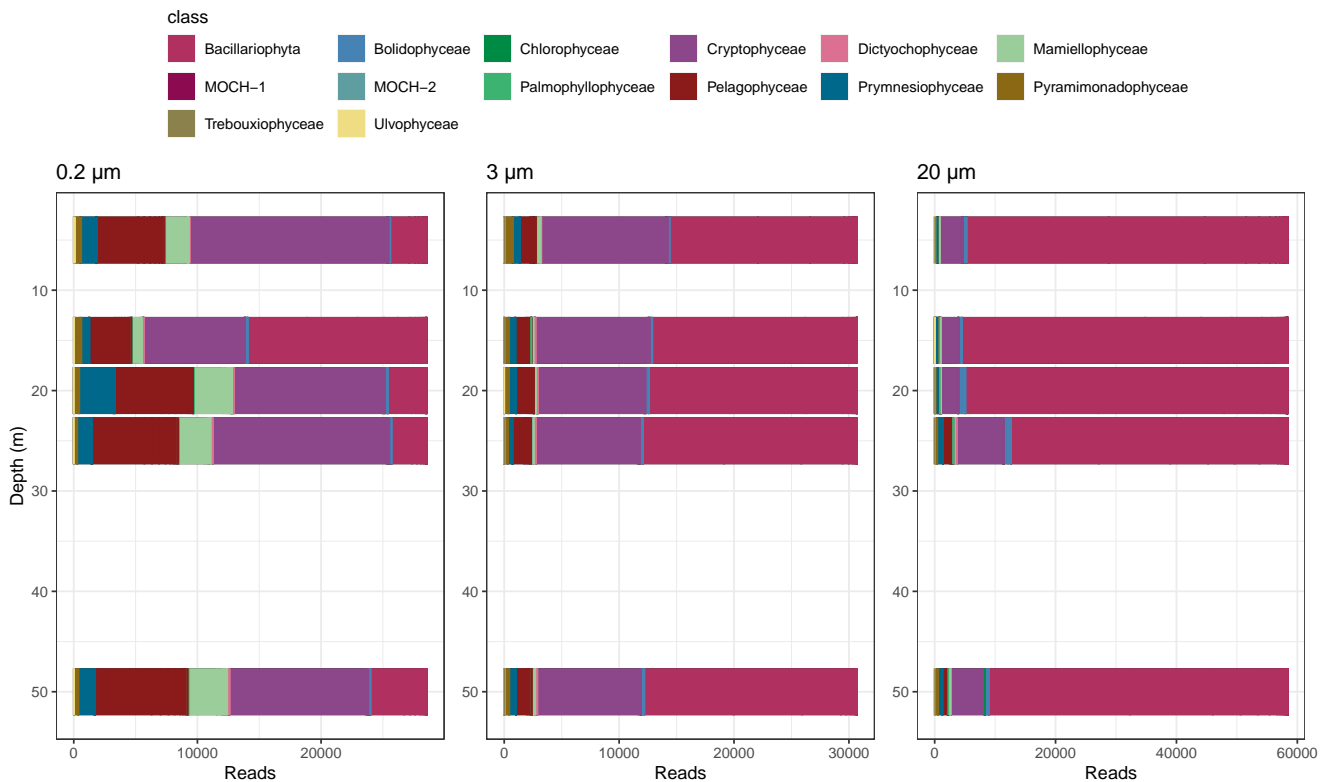

**Figure S1.** Community composition of phytoplankton at the class level along a vertical profile obtained on January 16, 2015, from 5 m and down to 50 m, based on the 18S rRNA gene for filtered samples.

### 18S filter

0.2  $\mu$ m

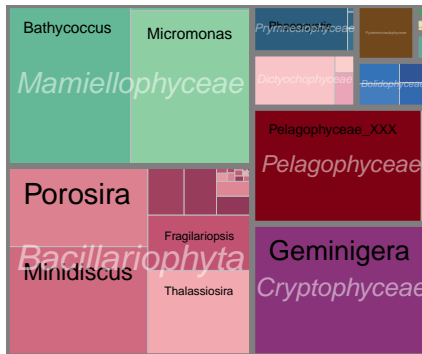

### 18S sort

pico

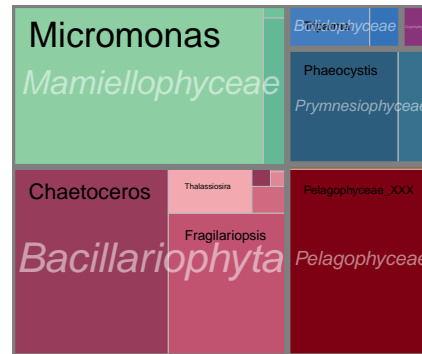

### 16S filter

0.2  $\mu$ m

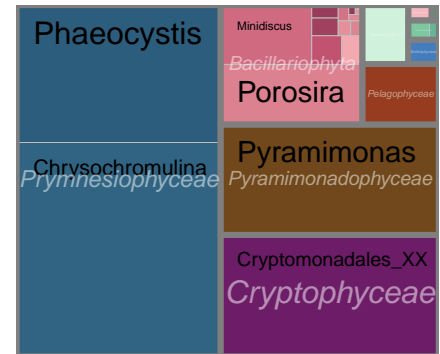

3  $\mu$ m

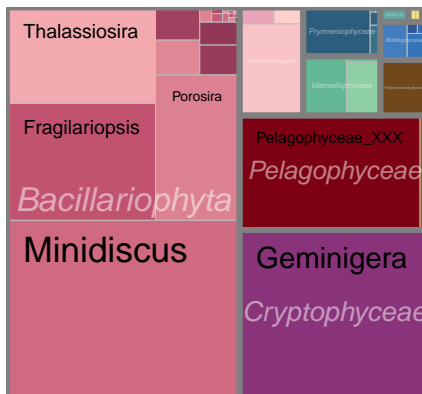

nano

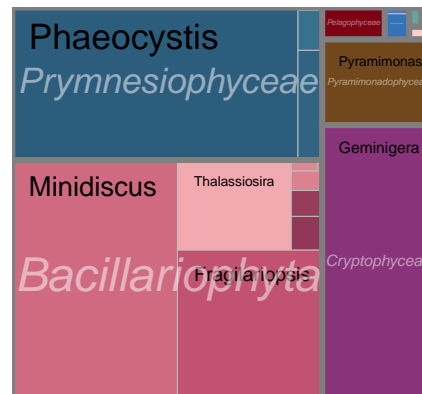

3  $\mu$ m

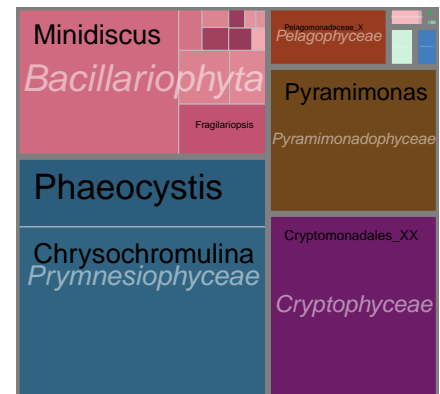

20  $\mu$ m

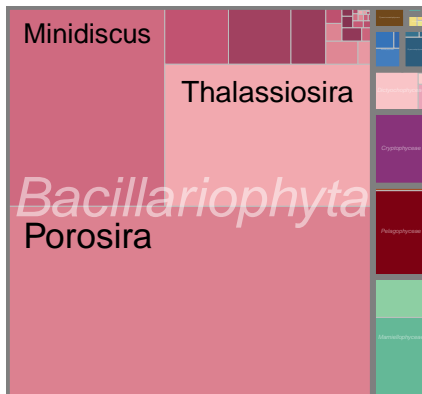

20  $\mu$ m

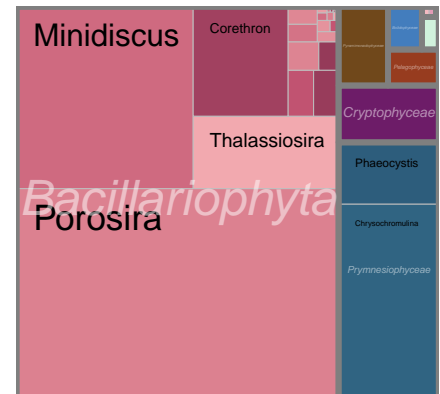

**Figure S2.** Relative abundance of the different genera in surface samples based on three different amplicon sequencing approaches for each size fraction. Left: 18S rRNA gene on filtered samples. Middle: 18S rRNA gene on sorted samples. Right: plastidial 16S rRNA gene on filtered samples.

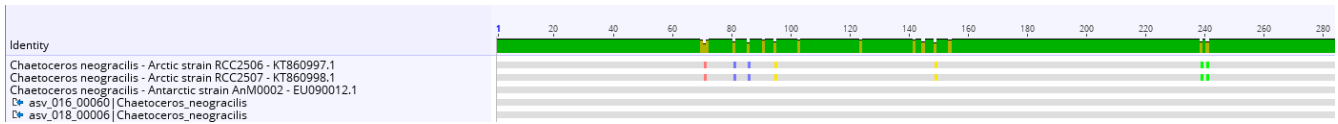

**Figure S3.** Sequence alignment of 18S rRNA ASVs for *Chaetoceros neogracilis* showing the differences between Arctic and Antarctic strains sequences. The ASVs from this study are identical to the Antarctic strain and show 7 bp differences to Arctic strains.

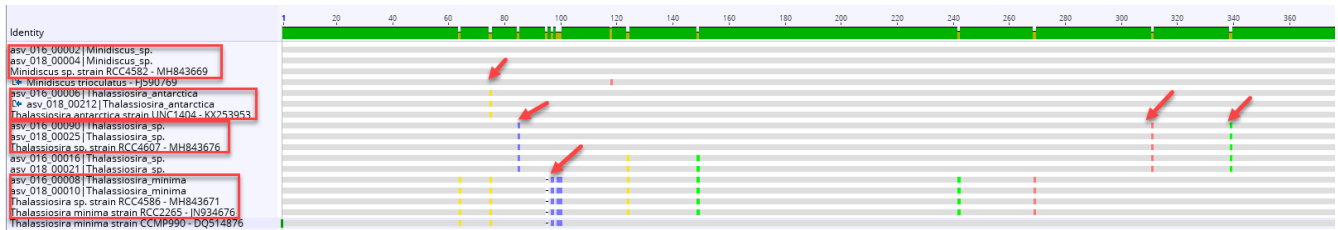

**Figure S4.** Sequence alignment of 18S rRNA ASVs for major *Thalassiosira* and *Minidiscus* ASVs in comparison to reference sequences.

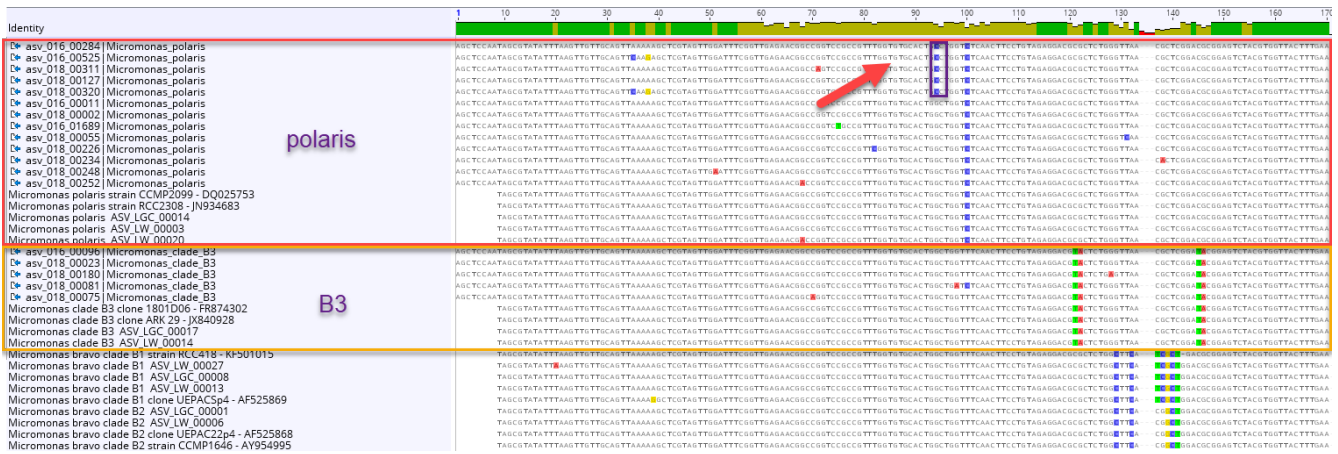

**Figure S5.** Sequence alignment of 18S rRNA ASVs for *Micromonas* showing the clear signatures for *M. polaris* and clade B3 (Tragin and Vaultot 2019). Within *M. polaris* some sequences have a different signature pointing to a new clade specific of Antarctic waters (arrow).

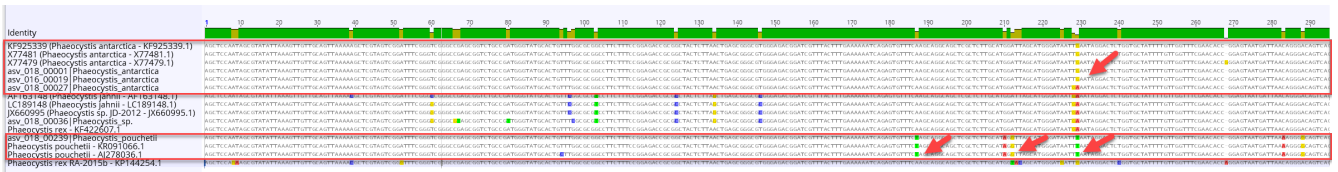

**Figure S6.** Sequence alignment of 18S rRNA ASVs for *Phaeocystis* showing the clear signatures for *P. antarctica* and *P. pouchetii*.

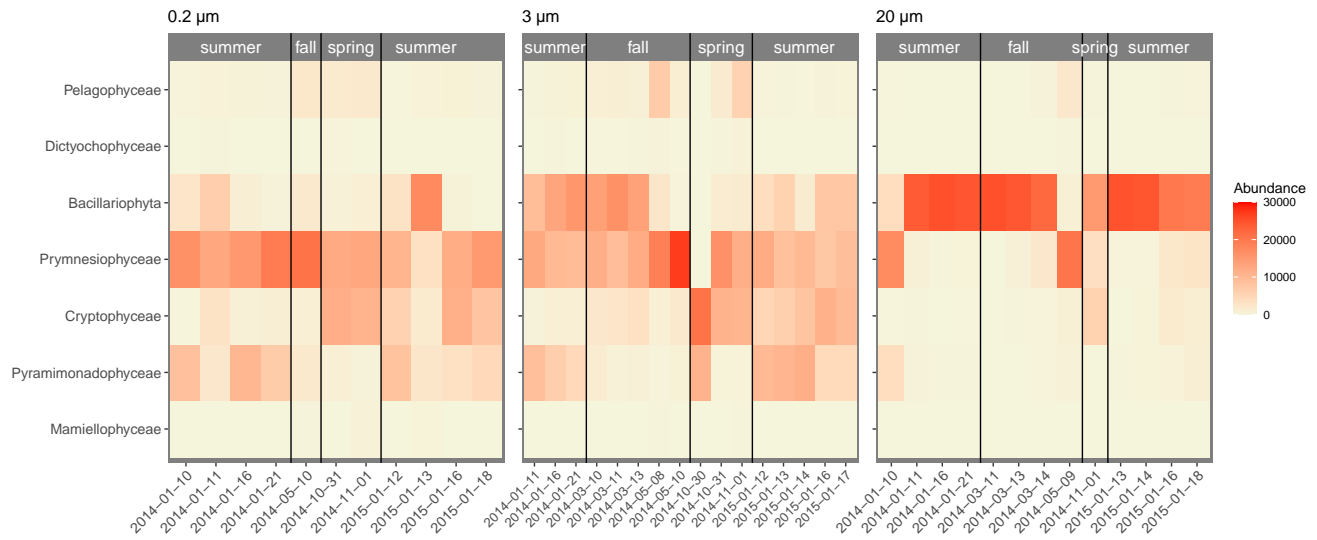

**Figure S7.** Read numbers for the main photosynthetic taxonomic groups at the class level for plastidial 16S rRNA gene for filtered surface samples. The color scale of the heatmap corresponds to the normalized number of reads of each taxon. Season delimitation corresponds to meteorological seasons. Left: 0.2-3 μm. Middle: 3-20 μm. Right: > 20 μm.

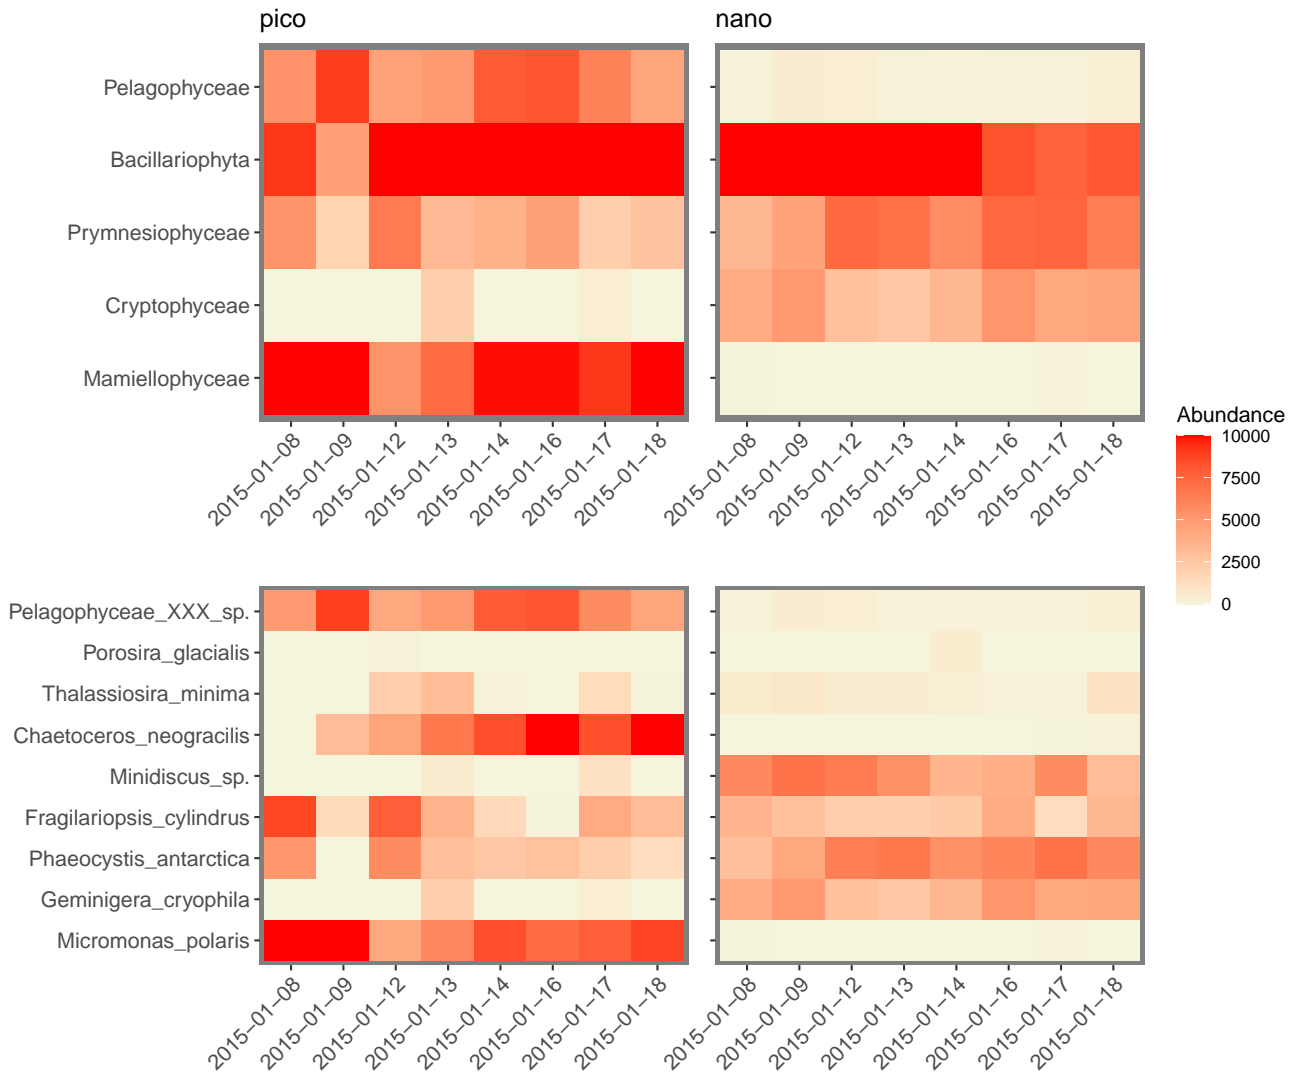

**Figure S8.** Read numbers for the main photosynthetic taxonomic groups at the class (Top) and genus (Bottom) levels of 18S rRNA gene for sorted samples from surface waters. The color scale of the heatmap corresponds to the normalized number of reads of each taxon. Left: pico size fraction. Right: nano size fraction.



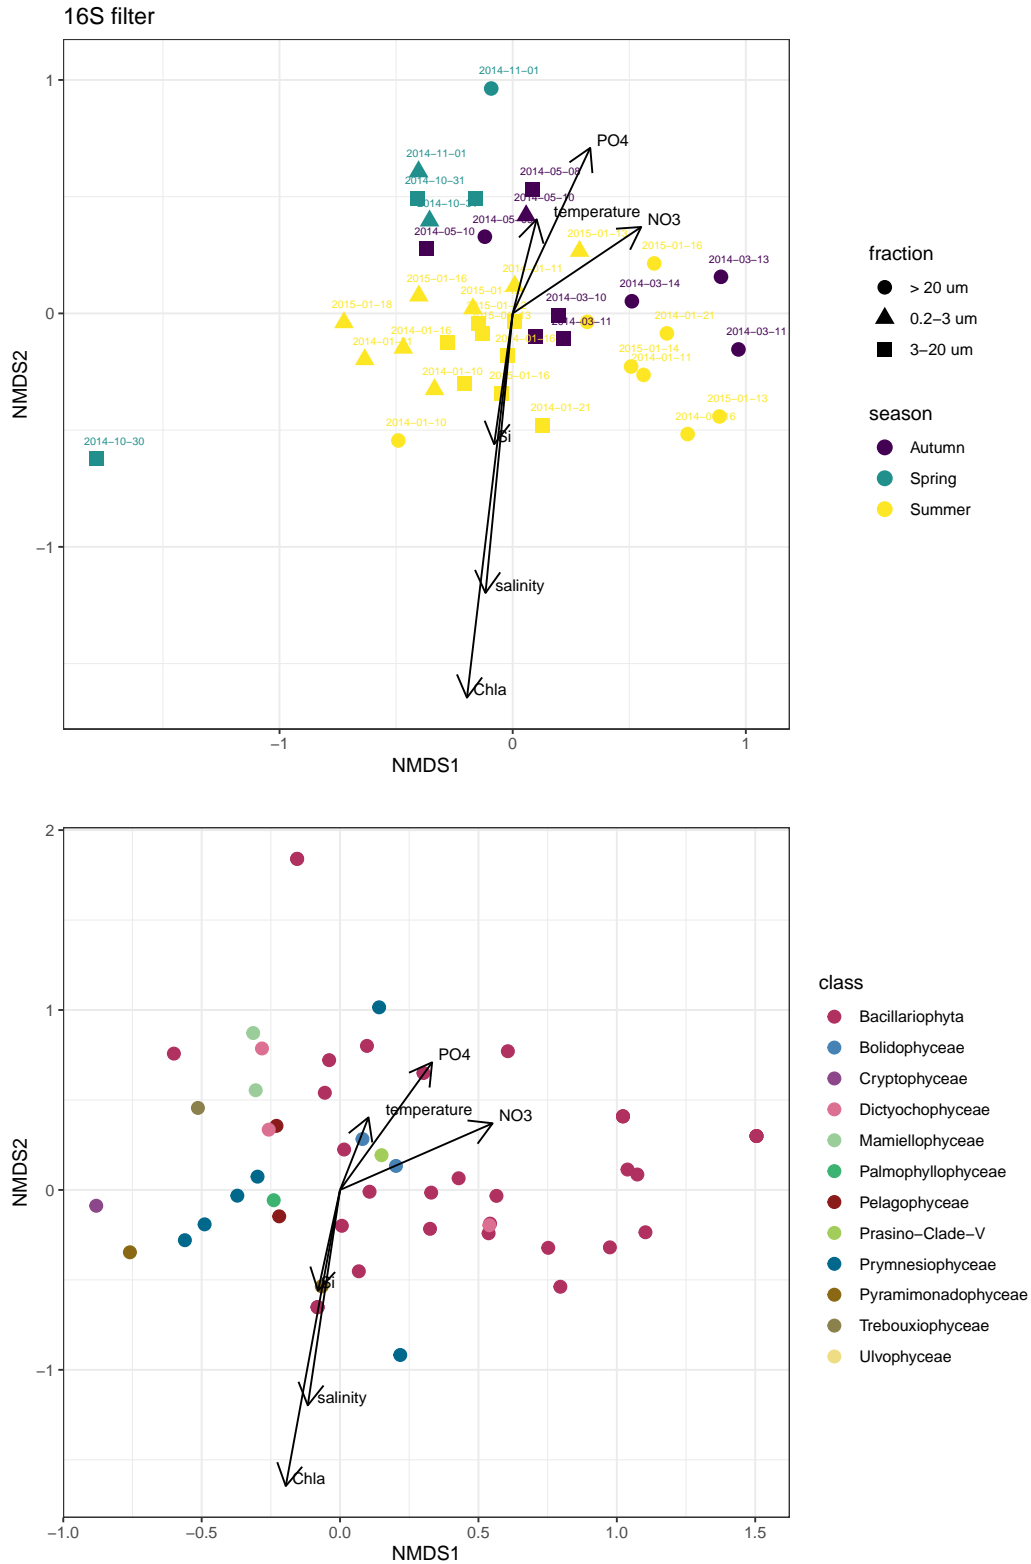

**Figure S9.** Non-metric multidimensional scaling (NMDS) analysis based on Bray-Curtis dissimilarities of the phytoplankton community composition (species) labeled by meteorological season and size fraction using the plastidial 16S rRNA gene. (A) Samples. (B) ASVs. Stress = 0.15.
